# 1 Interkinetic nuclear movements promote apical expansion in pseudostratified 2 epithelia at the expense of apicobasal elongation

3

4 Marina A. Ferreira<sup>2,+</sup>, Evangeline Despin-Guitard<sup>1</sup>, Fernando Duarte<sup>1</sup>, Pierre Degond<sup>2¶</sup> and Eric  
5 Theveneau<sup>1¶</sup>

6 1. Centre for Developmental Biology, Centre for Integrative Biology, CNRS, Université Paul Sabatier, 118 route de  
7 Narbonne, 31062 Toulouse Cedex 09, France.

8

9 2. Department of Mathematics, Imperial College London, London, SW7 2AZ, United Kingdom.

10

11 +. Current address. University of Helsinki, Department of Mathematics and Statistics, P.O. Box 68, FI-00014  
12 Helsingin yliopisto, Finland.

13

14 \*corresponding authors: [eric.theveneau@univ-tlse3.fr](mailto:eric.theveneau@univ-tlse3.fr) ; [p.degond@imperial.ac.uk](mailto:p.degond@imperial.ac.uk)

15

## 16 Abstract

17 Pseudostratified epithelia (PSE) are a common type of columnar epithelia found in a wealth of  
18 embryonic and adult tissues such as ectodermal placodes, the trachea, the ureter, the gut and  
19 the neuroepithelium. PSE are characterized by the choreographed displacement of cells'  
20 nuclei along the apicobasal axis according to phases of their cell cycle. Such movements,  
21 called interkinetic movements (INM) have been proposed to influence tissue expansion and  
22 shape and suggested as culprit in several congenital diseases such as CAKUT and esophageal  
23 atresia. INM rely on cytoskeleton dynamics just as adhesion, contractility and mitosis do.  
24 Therefore, longer term impairment of INM without affecting proliferation and adhesion is  
25 currently technically unachievable. Here we bypassed this hurdle by generating a 2D agent-  
26 based model of a proliferating PSE and compared its output to the growth of the chick  
27 neuroepithelium to assess the interplay between INM and these other important cell  
28 processes during growth of a PSE. We found that INM directly generates apical expansion and  
29 apical nuclear crowding. In addition, our data strongly suggest that apicobasal elongation of

30 cells is not an emerging property of a proliferative PSE but rather requires a specific  
31 elongation program. We then discuss how such program might functionally link INM, tissue  
32 growth and differentiation.

33

## 34 **Authors Summary**

35 Pseudostratified epithelia (PSE) are a common type of epithelia characterized by the  
36 choreographed displacement of cells' nuclei along the apicobasal axis during proliferation.  
37 These so-called interkinetic movements (INM) were proposed to influence tissue expansion  
38 and suggested as culprit in several congenital diseases. INM rely on cytoskeleton dynamics.  
39 Therefore, longer term impairment of INM without affecting proliferation and adhesion is  
40 currently technically unachievable. We bypassed this hurdle by generating a mathematical  
41 model of PSE and compared it to the growth of an epithelium of reference. Our data show  
42 that INM drive expansion of the apical domain of the epithelium and suggest that apicobasal  
43 elongation of cells is not an emerging property of a proliferative PSE but might rather requires  
44 a specific elongation program.

45

## 46 Introduction

47 Pseudostratified epithelia (PSE) are a special type of columnar epithelia in which cells  
48 are thin and elongated. Nuclei packing is very high and forces cells to distribute their nuclei  
49 along the apicobasal axis creating multiple layers of nuclei within a monolayer of cells, hence  
50 the term pseudostratification. PSE are found across the animal kingdom from invertebrates to  
51 vertebrates [1]. During development, several structures adopt a pseudostratified  
52 configuration such as the placodes and the central nervous system in vertebrates or the  
53 imaginal discs in *Drosophila*. In adults, PSE can be found along the respiratory, urinary and  
54 digestive tracts (e.g trachea, ureter, midgut) [2, 3] and various organs such as the gonads (e.g.  
55 epididymis) or the eye (lens, retina) [1]. One characteristic feature of PSE is the coordinated  
56 movements of nuclei during the cell cycle called interkinetic nuclear movements (INM) [4].  
57 INM are decomposed in several steps: an apical to basal movement occurring during the G1  
58 and S phases of the cell cycle and a basal to apical nuclear movement occurring during the G2  
59 and M phases. The apical-ward movement, sometimes referred to as PRAM (Pre-mitotic  
60 Rapid Apical Movement), can be achieved via microtubules like in the chick neuroepithelium  
61 [5] or in the brain of mouse and rat embryos [6, 7] as well as in the retina of post-natal mice  
62 [8]. Such movements can also occur in an actomyosin-dependent manner as observed in the  
63 retina of fish embryos [9]. The return of nuclei to basal positions after mitoses was initially  
64 proposed to be passive and a direct consequence of nuclear crowding in the apical region of  
65 PSE. However, there are numerous evidence indicating an active role of the cytoskeleton in  
66 apical to basal nuclear displacement. For instance, Kif1A, an anterograde molecular motor of  
67 microtubules, is required for the apical to basal movement of nuclei in rat brain [7]. In  
68 addition, in mouse telencephalon, myosin II was shown to be essential for apical to basal  
69 movement [10]. Further, in ferrets' brains apical to basal movements of nuclei are faster than

70 basal to apical movements suggesting that the nuclear movement towards basal regions of  
71 the brain is active while the opposite is observed in mouse [11]. All these observations  
72 indicate that INM is regulated by cytoskeleton-dependent mechanisms and that the actual  
73 mechanism employed differs from species to species and organ to organ.

74 One consequence of the cytoskeleton-based regulation of INM is that it renders INM  
75 difficult to study in vivo since it is far from the only cell process that relies on cytoskeleton  
76 dynamics. Cell-cell, cell-matrix adhesions and cell contractility require normal microfilaments  
77 and microtubules dynamics and mitosis relies on microtubules-driven separation of  
78 chromosomes and actomyosin-dependent cytokinesis. Therefore, it is currently technically  
79 impossible to study the specific roles that INM might have in PSE dynamics, growth and shape  
80 over long periods of time (hours to days) without impairing adhesions, contractility or cell  
81 division. This motivates the use of alternative approaches, such as computational modelling.

82 Many models of cell tissue mechanics can be found in the literature, ranging from  
83 agent-based [12] to continuum models [13, 14]. Agent-based models describe the tissue at  
84 the cell scale and have been used to study local phenomena, such as the influence of the  
85 variation of spatial constraints in the cell cycle [15], how curvature of an epithelial sheet is  
86 determined by mechanical tensions [16] or how contact inhibition of locomotion generates  
87 forces in the tissue [17]. Continuum models instead describe the system at the tissue scale  
88 (cell density) and study global properties, such as the tissue curvature, resistance to  
89 deformation [18], contraction-elongation and tissue shear flow [13]. Despite being easier to  
90 treat, both computationally and analytically, continuum models do not incorporate all  
91 information about individual cell shape and position. An agent-based model instead is able to  
92 provide detailed spatial information and, in particular, it can account for variability in cell  
93 characteristics associated with the different stages of the cell cycle and variability in cell shape

94 associated with the dynamics of INM (see [19] for a comparison between the continuum and  
95 agent-based frameworks). For these reasons, we opted for the agent-based approach. A large  
96 number of agent-based models of cell tissues have been developed in the last decades. The  
97 well-known Potts model [20] is a lattice-based model in which the cells may have complex  
98 shapes with a desired resolution. However, it has been reported that grid artefacts occur in  
99 cell movement and intercellular interactions [21] and they increase with particle density [22],  
100 which makes this model unsuited to describe crowded systems. Off-lattice models include for  
101 example the vertex model [15, 18, 23-25] and the Voronoi model [26, 27]. The tissue is  
102 regarded as a partition of space where each part represents one cell that is contiguous to its  
103 neighbours with no intercellular space between them. These models are able to describe  
104 densely packed systems. However, congestion is encoded into the model. In a PSE, nuclear  
105 crowding may not occur every time nor everywhere, so it should not be included in the model  
106 but rather occur as an emergent phenomenon.

107         Therefore, we reasoned that an appropriate framework to model a PSE would be an  
108 agent-based model where each cell moves in an off-lattice domain and interacts with its  
109 neighbours. Using such model, and comparing it with the chick neuroepithelium as a  
110 biological PSE of reference, we have explored the impact of INM, proliferation, adhesion and  
111 contractility on tissue shape, position of mitoses, pseudostratification and growth. Our results  
112 indicate that INM generates apical nuclear crowding, opposes apical shrinkage due to apical  
113 contractility and directly favors tissue growth oriented perpendicularly to the apicobasal axis  
114 (dorsoventrally, anteroposteriorly). Interestingly, all characteristics observed in the chick  
115 neuroepithelium such as apical positioning of mitoses, apical straightness, apical nuclear  
116 crowding and pseudostratification emerge from a combination of INM, proliferation, apical  
117 contractility and cell adhesion. However, the sustained linear apicobasal growth observed

118 during development of the chick spinal cord cannot be reproduced with this combination of  
119 parameters. We show that neuroepithelial cells undergo a dramatic change of shape  
120 concomitantly to a reduction of cell volume while elongating along the apicobasal axis. This  
121 change of cell shape exceeds what is needed to accommodate new nuclei added by  
122 proliferation. Therefore, our simulations and in vivo observations strongly suggest that, while  
123 INM contributes to the expansion of the apical domain, the observed in vivo apicobasal  
124 elongation requires a specific elongation program. We then discuss whether such program,  
125 together with INM promoting apical nuclear crowding, might be a way to coordinate tissue  
126 growth and differentiation.

127

128

129

## 130 **Results**

### 131 **Evolution of the chick trunk neuroepithelium from two to four days of development**

132 As a biological PSE of reference, we chose the trunk neuroepithelium of the chick  
133 embryo. The neuroepithelium is a well-described PSE and has the advantage of being easily  
134 accessible for observation and manipulation. We started by monitoring the evolution of the  
135 neuroepithelium at the level of the prospective forelimb (somites 15-20) between two and  
136 four days of development [28], corresponding to developmental stage HH13- (18 somites,  
137 48h of incubation) to stage HH23 (96 hours of incubation) and performed transversal  
138 cryosections (Fig 1A-B). Importantly, we focused on the intermediate region (half way  
139 between the dorsal and ventral sides of the tissue) to avoid the effect of extensive neuronal  
140 delamination and differentiation occurring in the ventral region of the tissue at these stages.  
141 We then performed immunostaining for phospho-histone H3 to label cells in mitosis and

142 counterstained for actin and DNA (Fig 1C-D). We found that the dorsoventral size of the  
143 neuroepithelium increases 2.45-fold over two days, going from an average of 133 $\mu$ m to  
144 326 $\mu$ m (Fig 1E), while the apico-basal size of the tissue grows by 2.3-fold from 50 $\mu$ m to  
145 115 $\mu$ m (Fig 1F). Over the same period, the antero-posterior distance from somite 15  
146 caudalward increases 3.56-fold, going from 2.6 to 9.4mm (S1 Fig). This indicates that growth  
147 of the posterior neuroepithelium between 2 and 4 days of development is biased toward  
148 anteroposterior growth. The number of pseudolayers of nuclei from apical to basal increases  
149 by 2.5-fold (Fig 1G). Interestingly, the distribution of nuclei changes from a homogenous  
150 distribution along the apicobasal axis in 48h-old embryos (Fig 1H, light green curve) to an  
151 accumulation of nuclei in the apical region in 72 and 96h-old embryos (Fig 1H, dark green  
152 curves). Note that nuclei density is lower in the basal region of the epithelium (Fig 1D). A  
153 change of average nuclear shape is also observed. The aspect ratio goes from 1.67 at 2 days  
154 to 2.01 at 4 days (Fig 1I). Nuclei become more elongated along the apicobasal axis (Fig 1D).  
155 This is due to a shortening of the nuclear length along the DV axis between 2 and 3 days of  
156 development while the length along the AB axis remains constant. By contrast, other  
157 parameters such as the straightness of the apical domain (Fig 1J), or the mean position of  
158 mitoses along the apicobasal axis (Fig 1K-L) do not significantly change (fold change inferior to  
159 1.1). From these observations, we next wondered whether the balance between cell  
160 adhesion, proliferation and INM would be sufficient to drive the growth of the  
161 neuroepithelium, the progressive apical accumulation of nuclei and the increased  
162 pseudostratification, while apical positioning of mitoses and apical straightness remain  
163 constant.  
164

165 **Fig 1. Growth of caudal neuroepithelium of the chicken embryo from 2 to 4 days of**  
166 **development.** A. Diagram of a chicken embryo at 48h of incubation (stage HH13-, 18 somites).  
167 B, transversal cryosections at the level of the forelimb at 48h, 72 and 96h of incubation. C-D,  
168 Confocal images of the intermediate region of the neuroepithelium at the level of the  
169 forelimb at 48, 72 and 96h of incubation, nuclei are stained with DAPI (grey) and actin with  
170 Phalloidin (green). Magenta line, apical domain; cyan line, basal domain. Note that the basal  
171 region progressively becomes devoid of nuclei. E, net dorsoventral length of the neural tube.  
172 F, net apicobasal length of the neural tube. G, number of pseudolayers of nuclei along the  
173 apicobasal axis. H, distribution of DAPI intensity along the apicobasal axis, normalized to the  
174 peak intensity in each dataset and to the apicobasal size so that the various stages can be  
175 compared. I, ratio of apicobasal and dorsoventral length of nuclei. J, straightness of apical  
176 domain (net distance between dorsal-most and ventral-most points of the apical surface  
177 divided by the actual length of the apical surface between these two points). K, positions of  
178 mitotic cells (either phospho-histone H3-positive cells or cells with condensed chromosomes  
179 from DAPI staining), at scale with the actual apicobasal size of the neural tube. L, positions of  
180 mitoses, raw data. Descriptive data collected from 20 embryos. Dots represent mean values.  
181 Error bars show the standard deviation. Box and whiskers plot: the box extends from the 25th  
182 to the 75th percentile; the whiskers show the extent of the whole dataset. The median is  
183 plotted as a line inside the box. AB, apicobasal; DV, dorsoventral; HH, Hamburger-Hamilton  
184 stages of chicken development; ss, somites.

185

## 186 **Agent-based model of PSE dynamics**

187 To be able to assess the impact of INM versus other cytoskeleton-dependent  
188 processes (e.g. adhesion, mitosis), we built an agent-based model of the neuroepithelium.



189 The chick neuroepithelium is an elongated PSE meaning that cells are very thin tubes with a  
190 large protruding nucleus giving them a watermelon-in-a-sock morphology (Fig 2A, S1 Movie).  
191 Cells are polarized according to the apicobasal axis with most of the cell-cell junctions  
192 localized apically and, conversely, the cell-matrix adhesions located basally [29]. In the model,  
193 each cell is approximated to a nucleus, an apical point and a basal point. The two points are  
194 attached to the nucleus via dynamic adjustable springs representing the viscoelastic  
195 properties of the cytoplasm (Fig 2B). Cells are placed next to one another along a lateral axis  
196 perpendicular to the apicobasal axis. Since the model is in 2D, this lateral axis can represent  
197 either the dorsoventral axis or the anteroposterior axis. Importantly, cells cannot intercalate  
198 nor swap positions. To model cell-cell and cell-matrix interactions we use simple mechanical  
199 and behavioural rules. On the apical side, apical points are attached to each other by apical-  
200 apical springs representing cell-cell adhesion. On the basal side, basal points are attached to a  
201 fixed basal line representing the basal lamina of the epithelium. Basal points can only move  
202 along the basal line and a maximum distance between adjacent basal points is implemented  
203 to avoid uncontrolled flattening of the tissue along the basal line. As in the real epithelium,  
204 apical points are only attached to their direct neighbors and thus can move within the 2D  
205 domain. Neuroepithelial cells are known to keep a straight shape. Thus, an alignment  
206 mechanism is set to prevent the apical point, the nucleus and the basal point of each cell from  
207 deviating significantly from a straight line. Nuclei cannot overlap. In the literature, non-  
208 overlapping constraints are approximated by a soft repulsion potential [30]. However, despite  
209 being computationally less expensive, this approximation becomes less and less accurate as  
210 the compression forces generated by congestion increase. Instead, we consider the nucleus  
211 being formed by an inner sphere (the hard core) and an outer sphere (the soft core). This  
212 representation allows soft cores to overlap with one another representing the deformation

213 that would occur when two nuclei are pressed against each other [31]. In the chick  
214 neuroepithelium, nuclei are slightly compressed along the dorsoventral axis, giving them an  
215 elongated form along the apicobasal axis (see Fig 1C-D). Overlap of soft cores leads to a  
216 repulsive force which is controlled by the non-overlapping constraints imposed to the nucleus  
217 inner core.

218

219 **Fig 2. Agent-based model of the pseudostratified epithelium.** A. 3D confocal image of a single  
220 neuroepithelial cells expressing membrane-GFP, in a 2-day old chick neuroepithelium (see S1  
221 Movie). B. Cells in the model are abstracted to a nucleus attached to a set of springs. C,  
222 implementation of cell cycle and INM during the simulation. Cells in the model constantly  
223 proliferate by going through a simplified cell cycle corresponding to three phases: a  
224 G1/S/passive G2 phase during which springs connected to the nucleus adjust to local  
225 constraints, a PRAM/active G2 phase during which apical-nucleus springs shrink while  
226 nucleus-basal springs elongate to recapitulate INM movements and the M phase during which  
227 springs behave as in G2. In addition, the hard core of nuclei enlarges in M phase to account  
228 for cell swelling and stiffening. Finally, at the end of the M phase each cell gives two daughter  
229 cells. One is systematically kept within the 2D-plane, the other daughter cell can be excluded.  
230 This parameter allows to control the rate of growth of the tissue independently of the pace of  
231 the cell cycle. See Supplementary Information for a detailed description of the model.

232

233 A clock, representing a simplified cell cycle, rules the proliferation rate. This *in silico*  
234 cycle has 3 phases. A first phase corresponding to G1, S and the part of G2 during which no  
235 directed movements of nuclei take place (Fig 2C; G1/S/passive G2). A second phase  
236 accounting for the active nuclear movements occurring in G2 known as pre-mitotic rapid

237 apical movements (PRAM; Fig 2C, PRAM/active G2). A third phase representing Mitosis (Fig  
238 2C; M). PRAM are implemented as follows: in cells entering active G2, the preferred rest  
239 length of apical-nucleus springs is set to 0 and the preferred rest length of the nucleus-basal  
240 spring is set to the current height of the cell. This drives an active apical-ward movement of  
241 the nuclei. In addition, during mitosis, the hard core of the nucleus increases (Fig 2C). Given  
242 that in our model cells have no cytoplasm, the increase of the hard core represents the  
243 known swelling and stiffening of cells during mitoses [32, 33]. At the end of mitosis daughter  
244 cells can be kept within the 2D-plane of the model or excluded. Thus, by systematically  
245 excluding 50% of the daughter cells we can keep the size of the cell population constant. This  
246 allows us to decouple the cell cycle and INM from actual proliferation (increase of cell number  
247 over time). Importantly, given the current lack of consensus about systematic active basal-  
248 ward movement of nuclei during G1 and S phases, we chose not to implement active  
249 movements of nuclei toward the basal side of the tissue in our model.

250 Outside of the PRAM/active G2 and M phases, apical-nucleus and nucleus-basal  
251 springs adjust their preferred rest length to their actual length, thus incorporating viscous  
252 behavior into the cytoplasm dynamics. This allows cells to accommodate their nuclei all along  
253 the apicobasal axis according to local constraints and forces (e.g., the position of the other  
254 nuclei or the forces on the various springs). Furthermore, there is a noise factor that allows  
255 nuclei to randomly move from their current location at each iteration of the simulation. In the  
256 chick neuroepithelium, nuclei are not known to display large scale random movements  
257 outside of PRAM. Thus, in our simulations, the noise is set very low compared to PRAM.

258 Each simulation is initialized with 30 cells. All cells have their apical point, nucleus and  
259 basal point aligned. Apical points and basal points are evenly distributed. This can be seen in  
260 the first frame of S2, S3 and S4 Movies. Then, at each time-iteration, the simulation runs as

261 follows: springs and nuclei are updated according to the position of each cell in the cell cycle,  
262 cells that are in mitosis divide and noise is implemented. Mitosis and noise may lead to the  
263 violation of the non-overlapping constraints on the nuclei hard cores. A minimization  
264 algorithm developed in [34] is then used to obtain an admissible configuration. This  
265 configuration corresponds to a local minimizer of the total mechanical energy in the system  
266 associated to the springs, nuclei soft core and alignment forces. A complete description of the  
267 mathematical model can be found in Supplementary Information and all parameters used for  
268 the simulations presented in all figures hereafter are summarized in S1 Table.

269

## 270 **INM opposes apicobasal elongation, generates apical nuclear crowding and enlarges the** 271 **apical domain**

272 To start with, we checked the evolution of the tissue in absence of proliferation (no  
273 INM, Fig 3) to assess the influence of cell-cell, cell-matrix adhesions and the non-overlapping  
274 constraints between nuclei. To do so, we set the minimum duration of the cell cycle to 10000  
275 hours making it unlikely that any cells would divide during the course of the 48-hour  
276 simulation. The apical-apical springs were set to be passive, meaning that they do not adjust  
277 their size in response to stretch or compression. In these conditions, there is no change in  
278 apicobasal size of the tissue (Fig 3A, red curve, AB) with nuclei distributing homogenously  
279 halfway along the apicobasal axis (Fig 3A, red curve, N). The number of pseudolayers remains  
280 constant (Fig 3B, red curve) and the apical domain stays flat (Fig 3C, red curve). See S2 Movie.  
281 In order to assess the effect of INM without adding more cells to the tissue, we set the  
282 exclusion rate of daughter cells to 50%. This means that after mitosis only one of the  
283 daughter cells was kept in the 2D-plane, keeping the total cell number constant. The total cell  
284 cycle duration is set to a range of 10 to 21 hours corresponding to averages of the known

285 values for the duration of the cell cycle in the chick trunk neuroepithelium between 2 and 4  
286 days of development [35]. G2 and M phases respectively last 90 and 30 minutes each,  
287 however active nuclear movements corresponding to PRAM only occur in a fraction of the  
288 total G2. Thus, in the model to generate normal INM conditions we set PRAM/active G2 and  
289 M phases to 30 min each (normal INM, Fig 3A-C, black curves). To generate low INM  
290 conditions where cells actively displace their nuclei for a shorter period, we set the duration  
291 of PRAM/active G2 to 0 and M to 6 minutes (one iteration only) (low INM, Fig 3A-C, brown  
292 curves). Introducing low or normal INM slightly reduces the apicobasal size of the tissue (Fig  
293 3A, brown and black curves AB are below the corresponding red curve) and the average  
294 position of nuclei shifted apically (Fig 3A, brown and black curves N are above the  
295 corresponding red curve). Adding INM also leads to a slight decrease in terms of pseudolayers  
296 (Fig 3B, black curve) and apical straightness (Fig 3C, black curve). Normal INM parameters  
297 lead to apical mitosis whereas low INM lead to a widespread distribution of mitoses along the  
298 apicobasal axis (Fig 3D). These data indicate that INM is sufficient to drive global nuclear  
299 apical crowding (Fig 3A, black curve), to slightly destabilize apical straightness and of course  
300 to control apical positioning of mitoses. In addition, we checked the lateral expansion of the  
301 apical, nuclear and basal domains under each of these 3 conditions. Each domain is defined  
302 by the length between the proximal and distal apical, nuclear and basal points along the  
303 lateral axis, respectively (Fig 3E-G). These analyses reveal that INM promotes the expansion of  
304 the apical domain, especially when all mitoses are apical (Fig 3E-G, magenta curves, arrow).  
305 See S2 Movie.

306

307 **Fig 3. INM opposes apicobasal elongation, generates apical nuclear crowding and enlarges the**  
308 **apical domain.** Simulations with passive apical-apical springs with INM (black and brown

309 curves) or without INM (red curves) with constant cell number (see S2 Movie). A, Apicobasal  
310 length of the PSE (AB) and mean nuclear position along the AB axis, expressed in  
311 micrometers. Note that INM reduces apicobasal length (black curve with open circles (INM) is  
312 below the red curve (no INM)) and generates apical nuclear crowding (black curve with closed  
313 circles (INM) is above the red curve (no INM)). B, Number of layers of nuclei along the AB axis.  
314 C, straightness of apical domain (net distance between the first and last apical point divided  
315 by the actual distance between these two points). D, Position of mitoses along AB axis, 1  
316 being apical. E-F, mean width of apical (magenta), nuclear (black) and basal (cyan) domains of  
317 the PSE over time. For each domain, the distance between the first and last point along  
318 the lateral axis is computed and its evolution plotted over time. Note that INM promotes  
319 enlargement of the apical domain (panel 3G, arrow). Each simulation was performed over 480  
320 iterations (48h of biological time) for 10 repetitions. Each curve represents the mean value of  
321 each dataset for the parameter plotted. Box and whiskers plot: the box extends from the 25th  
322 to the 75th percentile; the whiskers show the extent of the whole dataset. The median is  
323 plotted as a line inside the box.

324

325 Apical domains of epithelia are known to be dynamic and to display actomyosin  
326 contractility [36]. In addition, epithelial cells are known to resolve local imbalances in tension,  
327 compression and shear by aligning their cytoskeleton [37]. Further, apical constriction is  
328 known to be important for epithelial cell shape changes from squamous to columnar which  
329 corresponds to an apicobasal elongation [16, 36]. Thus apical constriction may be an  
330 important driving force for apicobasal elongation in PSE. To explore this hypothesis, we first  
331 check that actomyosin contractility was important in the chick neuroepithelium by treating  
332 samples with the ROCK inhibitor, a compound specifically blocking Rho-dependent myosin

333 contractility (S2 Fig). Indeed, a brief 2-hour treatment with the ROCK inhibitor leads to a  
334 decrease of the apicobasal length, a reduction in pseudostratification, a rounding of nuclei  
335 and a decrease of the apical straightness. In addition, mitoses are not systematically apical (S2  
336 Fig). These data indicate that the chick neuroepithelium has a short-term reliance on  
337 actomyosin contractility to maintain its shape and mitoses positions. Therefore, we ran the  
338 same simulations as above but setting the preferred rest length of apical springs to 0 in order  
339 to model overall apical contractility. Therefore, apical springs dynamically adjust their sizes to  
340 reach this rest length (Fig 4). We found that introducing contractile apical springs leads to a  
341 slight increase of apicobasal elongation (Fig 4A, AB curves) but overall nuclear positioning (Fig  
342 4A, N curves), pseudostratification (Fig 4B) and tissue shape (Fig 4C) are not dramatically  
343 affected by having a contractile apical domain. In the absence of INM, contractile apical  
344 springs lead to a rapid shrinkage of the apical domain (Fig 4E, arrowhead). This effect is  
345 prevented by adding INM (Fig 4G, arrow) indicating that apical mitoses can oppose apical  
346 constriction (S2 Movie).

347

348 **Fig 4. INM opposes apical constriction.** Same simulations as in Fig 3 but with contractile  
349 apical-apical springs with INM (black and brown curves) or without INM (red curve), with  
350 constant cell number (see S2 Movie). A, Apicobasal length of the PSE (AB) and mean nuclear  
351 position along the AB axis, expressed in micrometers. B, Number of layers of nuclei along the  
352 AB axis. C, straightness of apical domain (net distance between the first and last apical point  
353 divided by the actual distance between these two points). D, Position of mitoses along AB  
354 axis, 1 being apical. E-G, mean width of apical (magenta), nuclear (black) and basal (cyan)  
355 domains of the PSE over time. For each domain, the distance the between the first and last  
356 point along the lateral axis is computed and its evolution plotted over time. Note that apical

357 contractility reduces the width of the apical domain (panel 4E, arrow), whereas introducing  
358 INM opposes apical constriction (panel 4G, arrow; red curve in G is higher than in E). Each  
359 simulation was performed over 480 iterations (48h of biological time) for 10 repetitions. Each  
360 curve represents the mean value of each dataset for the parameter plotted. Box and whiskers  
361 plot: the box extends from the 25th to the 75th percentile; the whiskers show the extent of  
362 the whole dataset. The median is plotted as a line inside the box.

363

### 364 **Increase in cell number strongly increases pseudostratification but has a weak effect on** 365 **apicobasal elongation**

366 Since neither INM nor apical constriction are sufficient to drive extensive apicobasal  
367 elongation, we next wanted to compare the impact of having passive or contractile apical-  
368 apical springs in the context of increasing cell number by proliferation (allowing more than  
369 one daughter cell to remain in the 2D plane after mitosis). For that, we ran two sets of  
370 simulations with passive or contractile apical-apical springs and with different rates of  
371 exclusion of daughter cells ranging from 0% (all cells generated by mitosis are added to the  
372 2D plane) to 50% (one daughter cell is systematically excluded). INM is set to normal with  
373 PRAM/active G2 and M phases lasting 30 min each in all conditions. All outputs of simulations  
374 with passive apical-apical springs are plotted in shades of grey to black whereas outputs for  
375 simulations with contractile apical-apical springs are plotted in shades of hot colors from  
376 yellow to dark red. Contractile apical-apical springs have a slight positive impact on tissue  
377 apicobasal elongation (Fig 5A, AB curves; all colored curves are above their corresponding  
378 grey-to-black curves). This is accompanied by a slight apical shift of nuclei (Fig 5A, N curves).  
379 Pseudostratification correlates directly with the number of cells retained in the 2D plane (Fig  
380 5B). At maximal (50%) or intermediate (40%, 30%) exclusion rates of daughter cells,



381 contractile apical-apical springs further increase pseudostratification (Fig 5B, orange and red  
382 curves are above their cognate grey-to-black curves; S3 Movie). This effect is lost when all  
383 cells are retained (Fig 5B, 0% exclusion, yellow and grey curves overlap). With passive apical-  
384 apical springs the PSE shape becomes very sensitive to an increase of cell number. The more  
385 cells are kept within the 2D plane of the epithelium the faster apical straightness decreases  
386 (Fig 5C). Introducing contractile apical-apical springs mitigates the effect of hyper-  
387 proliferation (Fig 5C, orange and red curves stay close to straightness of 0.9). We then  
388 monitored the lateral expansion of apical, nuclear and basal domains over time for all  
389 conditions (Fig 5D-I). Increase in cell number induces a rapid expansion of the apical domain  
390 (Fig 5D-F). Interestingly, the apical shrinkage induced by contractile apical springs (Fig 5G, red  
391 curve) can be opposed by increasing the number of cells (Fig 5H-I, magenta curves). In  
392 addition, apical contractility positively feeds back into basal expansion. Note that the cyan  
393 curves in panels 5H and 5I increase faster than in panels 5E and 5F. These data indicate that  
394 an increase in total cell number drives a slight increase in apicobasal length, strongly drives  
395 pseudostratification and, in addition to INM, leads to an expansion of the apical domain.  
396 Interestingly, in the context of increasing cell number, apical contractility promotes basal  
397 rearrangements, an effect not seen with constant cell numbers (compare the cyan curves in  
398 panels 3E-G and 4E-G, with cyan curves in panel 5D, 5G). Further, apicobasal constriction  
399 slightly contributes to pseudostratification and helps maintain tissue shape during tissue  
400 growth.

401

402 **Fig 5. Increase in cell number drives pseudostratification and apical contractility feeds back**  
403 **into basal rearrangements.** Simulations with passive or contractile apical springs, normal INM  
404 and various rates of exclusion of daughter cells (see S3 Movie). A, apicobasal length of the PSE

405 (AB) and mean nuclear position along the AB axis (N) over time expressed in micrometers. B,  
406 Number of pseudolayers of nuclei along the AB axis. C, straightness of apical domain (net  
407 distance between the first and last apical point divided by the actual distance between these  
408 two points). D-F, mean width of apical (magenta), nuclear (black) and basal (cyan) domains of  
409 the PSE with passive apical-apical springs over time with 50 (D), 40 (E) and 30% (F) of  
410 daughter cells being excluded from the 2D plane. G-I, mean width of apical (magenta),  
411 nuclear (black) and basal (cyan) domains of the PSE with contractile apical-apical springs over  
412 time with 50 (G), 40 (H) and 30% (I) of daughter cells being excluded from the 2D plane. For  
413 each domain, the distance the between the first and last point along the lateral axis is  
414 computed and its evolution plotted over time. Note that apical contractility leads to basal  
415 rearrangements (compare cyan curves in H-I grow faster than in E-F). Each simulation was  
416 performed over 480 iterations (48h of biological time) for 10 repetitions. Each curve  
417 represents the mean value of each dataset for the parameter plotted.

418

419 **Neuroepithelial cells undergo a dramatic change in shape that exceeds what is needed to**  
420 **accommodate nuclei along the apicobasal axis**

421 So far, our simulations reveal that a progressive increase of pseudostratification, apical  
422 nuclear accumulation and apical mitoses can emerge from cell-cell/cell-matrix adhesion,  
423 proliferation and INM. However, none of the conditions tested allows a rapid apicobasal  
424 elongation of the tissue over 48h. This suggests that something is missing in our model. To  
425 achieve fast apicobasal elongation, cells could either get bigger (increase of cell volume) or  
426 elongate beyond what is necessary to accommodate the increase in number of nuclei due to  
427 proliferation. Our descriptive in vivo data (Fig 1A-B) show that a region of low nuclei density is  
428 formed in the basal domain of the chick neuroepithelium between 48h to 96 hours of

429 incubation. This is driven by INM in our model (Fig 3A). Such low basal density of nuclei has  
430 been seen in other elongated PSE as well [29]. This observation suggests that apicobasal  
431 elongation of cells may not be driven by the piling of nuclei along the apicobasal axis. Could  
432 elongation be caused by a change of cell shape or are cells also changing in size? To answer  
433 this question, we dissected explants of the neuroepithelium from the forelimb region (facing  
434 somites 15 to 20) in embryos at 2, 3 and 4 days of development (Fig 6A). Neural tubes were  
435 enzymatically isolated from surrounding tissues and dissociated to produce a suspension of  
436 single neuroepithelial cells (see material and methods). Cells were automatically counted and  
437 their diameters retrieved using a cell counter. From these measurements, volumes were  
438 calculated. This analysis reveals that the mean volume of neuroepithelial cells decreases  
439 between 2 and 3 days of development and remains stable from 3 to 4 days (Fig 6B-C). We  
440 next checked the size of the apical domains by performing *en face* microscopy on  
441 neuroepithelia from the same stages (Fig 6A, D-E). We found that the mean area occupied by  
442 the cells' apical sides is also significantly getting smaller between 2 and 3 days of  
443 development but does not significantly change from 3 to 4 days (Fig 6D-E). These data  
444 indicate that neuroepithelial cells undergo a dramatic change of cell shape, together with a  
445 reduction of cell volume, which appear to exceed what would be needed to accommodate  
446 the increase of cell nuclei along the apicobasal axis. This strongly suggests that  
447 undifferentiated PSE cells specifically elongate rather than simply adjust to local nuclear  
448 crowding.

449

450 **Fig 6. Mean volume and mean apical surface of chick neuroepithelial cells decreases between**  
451 **2 and 3 days of development.** A, Diagram depicting the regions used for the preparation of  
452 cell suspensions and open book histology from chicken embryos at 2, 3 and 4 days of

453 development (see Methods for details of the experimental procedures). Region monitored  
454 (from somite 15 to 20, forelimb region) is indicated by a dotted line. B, representative images  
455 of neuroepithelial cells in suspension after neural tube dissection and enzymatic dissociation.  
456 C, mean volume of neuroepithelial cells over time ( $n_{48h}=82$ ;  $n_{72h}=568$ ;  $n_{96h}=1168$ ). Cells get  
457 significantly smaller from 2 to 3 days of development and remain stable. Box and whiskers  
458 plot: the box extends from the 25th to the 75th percentile; the whiskers show the extent of  
459 the whole dataset. The median is plotted as a line inside the box. One-way ANOVA (Kruskal-  
460 Wallis) followed by Dunn's multiple comparisons. \*\*\*\*,  $p<0.0001$ ; ns,  $p>0.9999$ . D, *en face*  
461 view of the apical domain of the intermediate region of the neuroepithelium (actin is stained  
462 by Phalloidin). E, mean area of the individual apical surfaces over time ( $n_{48h}=67$ ;  $n_{72h}=66$ ;  
463  $n_{96h}=81$ ). Apical surfaces shrink from 2 to 3 days of development and remain stable. Dots  
464 represent mean of the dataset, error bars represent S.D. One-way ANOVA followed by  
465 multiple comparisons. \*\*\*\*,  $p<0.0001$ ; ns,  $p=0.1586$ .

466

#### 467 **Apicobasal elongation requires a specific elongation force**

468 Therefore, we wondered whether adding a global non-oriented expansion force might  
469 account for the apicobasal elongation observed in vivo. To do that, we increased the amount  
470 of noise on nuclear position at each iteration. All nuclei are allowed to move in a random  
471 direction at each iteration of the simulation. Since apical-nucleus and nucleus-basal springs  
472 are able to update their rest length to adjust to their actual size, any increase in random  
473 nuclear movements forces the apical-nucleus and nucleus-basal springs to stretch. Given that  
474 cells are attached to the basal line, to each other and that cells are prevented from bending  
475 due to an imposed alignment force, increasing random nuclear noise should generate a linear  
476 apicobasal elongation force. We ran simulations with conditions similar to those presented in

477 Fig 4 but with a 25-fold increase of random nuclear movements (Fig 7). Under these  
478 conditions, we observed a 2-fold increase in apicobasal length (Fig 7A, S4 Movie) whereas the  
479 number of pseudolayers (Fig 7B) and apical straightness (Fig 7C) were similar to the values  
480 obtained with low noise (Fig 5B-C). In addition, increasing noise does not affect the overall  
481 dynamics of lateral expansion of the tissue (Fig 7D-F). At low percentages of exclusion of  
482 daughter cells (30%) the lateral expansion of the apical domain is faster than that of the basal  
483 domain (Fig 7F, compare magenta and cyan curves). Thus, we attempted to solve this issue by  
484 allowing basal points to update their positions at a faster rate. This was sufficient to allow an  
485 isotropic expansion of the tissue (Fig 7G, black, cyan and magenta curves grow at the same  
486 pace; S4 Movie). Finally, our previous simulations (Figs 3 and 4) hinted that INM was capable  
487 of opposing apicobasal elongation. We wanted to check if this was still true under the  
488 extensive apicobasal growth generated by increased noise. We repeated the same  
489 simulations as shown in Fig 7, excluding 50% of daughter cells to keep total cell number  
490 constant, but setting low INM conditions with PRAM/active G2 set to 0 and M to 6min. (S3  
491 Fig). Under low INM conditions, the PSE elongates along the apicobasal axis faster than with  
492 normal INM and there is a shrinkage of the apical domain (S5 Movie) confirming our previous  
493 observations.

494

495 **Fig 7. Apicobasal elongation requires a specific elongation force.** Simulations with contractile  
496 apical springs, normal INM and high noise. A, apicobasal length of the PSE (AB) and mean  
497 nuclear position along the AB axis (N) over time expressed in micrometers (see S4 Movie). B,  
498 Number of pseudolayers of nuclei along the AB axis. C, straightness of apical domain (net  
499 distance between the first and last apical point divided by the actual distance between these  
500 two points). D-G, mean width of apical (magenta), nuclear (black) and basal (cyan) domains of

501 the PSE with dynamic apical-apical springs over time with 50 (D), 40 (E) and 30% (F-G) of  
502 daughter cells being excluded from the 2D plane. For each domain, the distance the between  
503 the first and last point along the lateral axis is computed and its evolution plotted over time.  
504 D-F, slow update of basal point positions (as in all previous Figs). G, fast update of basal point  
505 positions (twice faster). Each simulation was performed over 480 iterations (48h of biological  
506 time) for 10 repetitions. Each curve represents the mean value of each dataset for the  
507 parameter plotted.

508

509 In conclusion, our data indicate that: i/ pseudostratification is mainly controlled by the  
510 increase of cell number, ii/ apical contractility is essential to maintain tissue shape in the  
511 context of a high proliferation rate, iii/ INM promotes the expansion of the apical domain, iv/  
512 INM opposes pseudostratification, apical constriction and apicobasal elongation whereas it  
513 controls apical positioning of mitosis and apical nuclear crowding, v/ apicobasal elongation of  
514 cells is likely to be due to an active elongation program and not a mere consequence of  
515 increased nuclear density (Fig 8).

516

517 **Fig 8. Interplay between INM, proliferation and cell adhesion in the context of a specific**  
518 **apicobasal elongation program are needed to recapitulate normal PSE dynamics.** Green  
519 arrows indicate positive action, red arrows indicate negative/inhibitory action. Dotted line  
520 indicate weaker effect than plain lines. PRAM, pre-mitotic rapid apical migration; PRAR, post-  
521 mitotic rapid apical removal; INM, interkinetic nuclear movement.

522

523

524

## 525 Discussion

526 Our simulations clearly link INM to the rapid emergence of nuclear crowding in the  
527 apical domain and to the formation of a region of low nuclear density in the basal part of the  
528 PSE. Yet, *in vivo*, the low nuclear density observed in the basal domain of the chick trunk  
529 neuroepithelium (forelimb level) only emerges in 3-to-4-day old embryos. This could be due  
530 to a lack of INM at early stages of neural plate/tube development. This is unlikely since apical  
531 mitoses have been observed even at open neural plate stages in chick and mouse embryos  
532 [38, 39]. Alternatively, at early stages, there could be a counterbalancing post-mitotic rapid  
533 apical removal (PRAR, Fig 8) of nuclei as part of the INM, as suggested in rats and ferrets'  
534 brains [7, 11]. Such active basal-ward movement would prevent the early formation of a  
535 crowded apical domain and that of a relatively loose basal domain. Neuroepithelial cells  
536 always detach from the apical surface upon differentiation into neurons but they can also be  
537 induced to detach from the apical surface by a local increase of the apical density of nuclei  
538 [40, 41]. Thus, it may be important to delay apical nuclear crowding to prevent early  
539 delamination of undifferentiated neural progenitors from the apical domain. Therefore, one  
540 could propose that regulation of the intensity of INM might control the onset of neuron  
541 delamination in order to synchronize neuronal differentiation with the development of the  
542 spinal cord itself. The loose basal region may also be needed to accommodate the cell body of  
543 delaminating neurons which accumulate in the basal side of the epithelium. In addition, or  
544 alternatively, INM might control the onset of neuron delamination in order to synchronize  
545 neuronal differentiation with the development of adjacent structures awaiting innervation.  
546 For instance, it would be interesting to see if somites (or the myotome), which produce  
547 muscles to be innervated, interfere with the patterns of INM in the adjacent neural tube.

548           Apical constriction is known to be essential to promote the apicobasal elongation  
549 driving the switch from squamous to cuboidal epithelial sheets [36]. Yet, in our simulation  
550 apical constriction was a poor driver of apicobasal elongation. This is likely due to the fact that  
551 in elongated PSE the apical surface is small compared to the size of the basolateral membrane  
552 of cells. In the trunk of a 2-day old chicken embryo, the diameter of the apical surface is  
553 around 5 microns whereas cells are already 50 microns tall. Thus, any change of the apical  
554 size will only have a marginal effect on cell height. At early stages, during the folding of the  
555 neural plate, actomyosin contractility is important and Rho and myosin are detected in the  
556 apical region of most neuroepithelial cells [42]. It is proposed that apical constriction may  
557 drive cell shape changes contributing to neural plate bending. However, the region that  
558 undergoes the most dramatic change of shape, the medial hinge point located at the midline  
559 above the notochord, has little and only transient accumulation of Rho. In addition, in mice  
560 with targeted defects in cytoskeletal genes, neurulation of the caudal neural tube is rarely  
561 affected [43]. Following observations in chick [44] and mouse [38, 45] embryos, it was  
562 alternatively proposed, that the change in cell shape at the medial hinge point could be driven  
563 by local differences in INM in the neural plate, with cells above the notochord having longer  
564 S-phase. The nuclei would spend more time in the basal regions favoring an enlargement of  
565 the basal domain. This would let cells adopt a pyramidal shape promoting tissue folding. As  
566 for the effect of apical constriction, a longer S-phase is unlikely to generate any significant  
567 change in cell shape in elongated PSE since the width of the nucleus only represent a small  
568 fraction of the total cell height. It is interesting to note that while the intermediate region of  
569 the neuroepithelium exhibits a fast linear increase in apicobasal size from 2 to 4 days of  
570 development, the cells located in the floor plate of the neural tube do not change significantly  
571 in height during this period. If indeed their pyramidal shape is linked to a specific cell cycle



572 with a long S-phase, this relationship can only be maintained if the cells do not elongate  
573 beyond a size that would mitigate the effect of the position of the nucleus.

574           Histological analyses in mice with CAKUT (congenital anomalies of the kidney and  
575 urinary tract) or EA/TEF (Esophageal atresia/tracheoesophageal fistula) [2, 3] show a  
576 correlation between tissue expansion defects and local lack of INM. The local loss of INM  
577 (basal mitoses) correlates with problems of convergence extension and defects in tissue  
578 separation which were proposed to be due to a loss of apicobasal polarity in these  
579 syndromes. Interestingly, INM is not a permanent feature of all PSE. In mouse, INM stops  
580 around E13 in the esophagus meaning that from this stage basal mitoses naturally occur in  
581 this tissue [2]. By contrast, by E14, INM and apical mitoses can still be observed in the brain,  
582 the trachea, the ureter and the intestine. As with the correlation between lack of expansion  
583 and lack of INM in the aforementioned syndromes, it was proposed that INM might be a  
584 driving force of tissue expansion, since the organs in which it persists expand at a faster rate  
585 than the overall growth of the embryo at these stages. Here we show that INM directly  
586 contributes to expansion of the apical domain and thus promotes growth in axes  
587 perpendicular to the apicobasal axis (DV, AP). In vivo, other mechanisms likely contribute to  
588 tissue expansion along the dorsoventral or anteroposterior axis. One possibility is cell  
589 intercalation. This has been observed during neurulation in mouse [38]. The dorsal regions of  
590 the neural plate grow faster than the ventral regions. This is due in part to a faster cell cycle  
591 but also to significant cell intercalation from ventral to dorsal.

592           Another mechanism that could contribute to tissue expansion in one direction is the  
593 orientation of mitotic spindles. It was observed in the chick neural tube that, at early stages  
594 (HH7 to HH12, corresponding to 24 to 44h of incubation), most mitoses (circa 55%) were  
595 oriented along the anteroposterior axis [39]. Such percentages would correspond to an

596 exclusion rate of daughter cells of 27% in our simulation. Therefore, with such a biased  
597 orientation, proliferation would favor anteroposterior elongation of the neuroepithelium  
598 compared to expansion in apicobasal and dorsoventral orientations. In addition, in most PSE  
599 studied, the mean cell cycle length tends to change over time. It can get longer in the caudal  
600 neural tube [35] and in the brain [46] or shorter as in the ureteric epithelium [3] and the  
601 midgut [47]. Changes in cell cycle length will obviously change the rate at which a tissue  
602 increases in terms of cell number but will also affect the frequency of INM events. Given that  
603 apical localization of mitoses drives expansion of the apical domain by opposing apical  
604 constriction, such changes in cell cycle pace may also affect tissue shape. Indeed, in our  
605 simulations, imbalances in proliferation and apical contractility were sufficient to promote  
606 either bending or buckling of the apical surface (see S4 Movie). To maintain tissue shape and  
607 straightness of the apical domain, the rapid expansion of the apical domain needs to be  
608 compensated by an equivalent expansion of the basal domain or hindered by extensive apical  
609 constriction.

610 Further, defects in microtubule dynamics can lead to lissencephaly and microcephaly  
611 two common neurodevelopmental defects due to improper growth of the brain. This  
612 prompted some to suggest that impaired INM, a microtubule-dependent phenomenon, might  
613 contribute to these pathologies [48, 49]. However, all of these microtubule-related defects  
614 have also problems in neuronal migration, mitotic spindle positioning and proliferation  
615 making it difficult to identify the effects specifically due to a lack of INM.

616 Finally, our data indicate that apicobasal elongation is likely to require a specific cell  
617 elongation program. In the model, we generated the elongation force using an artificially  
618 increased nuclear noise. Given that, outside of PRAM, such large scale random nuclear  
619 movements were never observed in the chick neuroepithelium, it is very unlikely that in vivo

620 apicobasal elongation comes from a progressive increase in random nuclear movements.  
621 Most likely, it comes from an extensive reorganization of the cytoskeleton. Experimentally  
622 disentangling the various putative cytoskeleton-related mechanisms involved in INM (PRAM  
623 or PRAR) and cell elongation will required the generation of new tools for the fine-tuning of  
624 actin/tubulin dynamics over long periods of time (hours to days) without affecting  
625 proliferation.

626

## 627 **Materials and Methods**

### 628 **Chicken eggs**

629 Fertilized chicken eggs were obtained from S.C.A.L (Société Commerciale Avicole du  
630 Languedoc) and incubated at 38°C until the desired stage [28].

631

### 632 **Histology and staining of chicken embryo samples**

633 Embryos were soaked in Phosphate Buffer 15% sucrose overnight at 4°C. Then, embryos were  
634 transferred for 2 hours in gelatin 7.5%/ sucrose 15%. Small weighing boats are used as molds.  
635 A small layer of gelatin/sucrose is deposited at the bottom and left to set. Embryos are then  
636 transferred on the gelatin layer using a 2.5mL plastic pipette. Each embryo is placed in a  
637 single drop and left to set. Once all drops are set, an excess of gelatin/sucrose solution is  
638 poured on to the weighing boat to fill it. Once again gelatin is left to set on the bench. After  
639 setting, the dish is placed at 4°C for 1 hour to harden the gelatin. Once ready, the block of  
640 gelatin containing the embryos is placed under a dissecting microscope and individual blocks  
641 are carved to position the embryos in the desired orientation for sectioning. Cryosections  
642 were performed using a Leica CM1950 cryostat. Sections were incubated in PBS1X at 42°C for  
643 30 minutes to remove the gelatin, treated with PBS1X, 1% triton, 2% serum for

644 permeabilization and blocking. Primary antibodies were diluted in PBS1X 2% newborn calf  
645 serum and applied overnight at 4°C under a coverslip. Secondary antibodies were diluted in  
646 PBS1X and applied for 2 hours at room temperature. Washes were done in PBS1X. Antibodies  
647 used: mouse anti-phospho-histone 3 (Cell Signaling, MA312B). Counterstaining for actin and  
648 DNA was done with Phalloidin (1/1000) and DAPI (1/1000).

649

### 650 **Suspension of neuroepithelial cells**

651 Samples of the whole trunk between somite 15 and 20 were taken from embryos at 2, 3 and  
652 4 days of development. The explants were incubated in Dispase II (Stem Cell Technologies;  
653 #07923, at 1U/mL) at 37°C for 20 minutes to degrade collagens and fibronectin. Tissues were  
654 then separated using mounted needles. Neural tube explants were then incubated in a  
655 trypsin solution (ThermoFisher, 25300054  
656 Concentration) to generate single cells. From neural tube explants from 3-day and 4-day old  
657 embryos, numerous cells (most likely neurons) did not adopt a round morphology after  
658 dissociation, instead they maintained an elongated fiber-like morphology and accumulated at  
659 the bottom of the tubes. They were not included in the supernatant used for cell diameter  
660 analysis.

661

### 662 **Open book observation**

663 Samples of the whole trunk between somite 15 and 20 were taken from embryos at 2, 3 and  
664 4 days of development. The neural tube was open from its dorsal side using forceps. The tip  
665 of one forceps is inserted in the neural tube lumen and moved along the anteroposterior axis  
666 to open the whole explant. Explants are then squeezed in between two coverslips to maintain  
667 them open. Apical side is positioned face down on an inverted microscope for observation.

668

## 669 **Imaging**

670 Confocal images were taken on a Zeiss 710 confocal microscope. Whole mount images were  
671 acquired on a Leica MZ10F.

672

## 673 **Statistics**

674 Statistical analyses of in vivo data were performed with Prism 6 (GraphPad). Datasets were  
675 tested for Gaussian distribution. Student t-tests or ANOVA followed by multiple comparisons  
676 were used with the appropriate parameters depending on the Gaussian vs non-Gaussian  
677 characteristics of the data distribution. Significance threshold was set at  $p < 0.05$ .

678

## 679 **In silico simulations and associated plots**

680 The code was written in Fortran90 in sequential mode and the simulations were performed  
681 on a DELL Precision T7810 with windows 8.1, 64 bits of RAM, with two CPU Intel Xeon E52637  
682 3.8 GHZ processors. The computational time of each simulation of the tissue evolution for 48  
683 hours (480 time iterations) ranges from 8 minutes with 30 cells and no proliferation to  
684 approximately 40 minutes with proliferation and the exclusion rate of daughter cells set to  
685 0%. For each set of in silico conditions at least 10 repetitions were performed. Data were  
686 processed using MatLab R2017b. Plots: for simplicity, mean values of each parameter were  
687 plotted at each time-iteration over 40 iterations (4hours) and error bars were not displayed.  
688 An example of error bars representing standard deviation can be seen on S3 Fig. To help  
689 visualizing differences between each in silico conditions, min and max values of equivalent  
690 graphs across the various Figs were kept constant.

691

## 692 **Acknowledgements**

693 We thank Drs Sara Merino-Aceituno, Samuel Tozer, Bertrand Benazeraf, Fabienne Pituello,  
694 Ariane Trescases and Elisa Marti for critical reading of the manuscript.

695

## 696 **Authors' contributions**

697 ET and PD conceived the project. MF and PD made the computational model with inputs from  
698 ET. ET, EDG and FD generated the biological data. ET designed and performed in silico  
699 simulations. ET, MF and PD interpreted and organized the data. ET, MF and PD wrote the  
700 manuscript. All authors commented on the manuscript.

701

## 702 **Funding**

703 ET acknowledges support from the Fondation pour la Recherche Médicale (FRM AJE201224),  
704 the Region Midi-Pyrénées (13053025), Toulouse Cancer Santé (DynaMeca), the CNRS and  
705 Université Paul Sabatier (UMR5547). FD and EDG were supported by Toulouse Cancer Santé  
706 (DynaMeca). PD acknowledges support by the Engineering and Physical Sciences Research  
707 Council (EPSRC) under grants no. EP/M006883/1 and EP/N014529/1, by the Royal Society  
708 International Exchanges under grant no. IE160750, by the Royal Society and the Wolfson  
709 Foundation through a Royal Society Wolfson Research Merit Award no. WM130048 and by  
710 the National Science Foundation (NSF) under grant no. RNMS11-07444 (KI-Net). PD is on  
711 leave from CNRS, Institut de Mathématiques de Toulouse, France. MF acknowledges support  
712 by Imperial College, Department of Mathematics, through a Roth PhD studentship, by The  
713 Company of Biologists, Disease Models and Mechanisms, through a Travelling fellowship and  
714 by the AtMath Collaboration of the Faculty of Science of the University of Helsinki. MF short-

715 term stays at CNRS and Université Paul Sabatier (UMR5547) were further supported by  
716 Toulouse Cancer Santé via the DynaMeca grant. The funders had no role in study design, data  
717 collection and analysis, decision to publish, or preparation of the manuscript.

718

## 719 **Data Availability Statement**

720 All relevant data are within the manuscript and its Supporting Information files.

721

## 722 **Competing interests**

723 The authors have declared that no competing interests exist.

724

## 725 **Ethics statement**

726 This research only used chicken embryos at early stages of development (before the 6th day).

727 None of the procedures fall under legal requirements for animal use and can be performed by

728 anyone without animal licence.

## 729 References

- 730 1. Norden C. Pseudostratified epithelia - cell biology, diversity and roles in organ  
731 formation at a glance. *Journal of cell science*. 2017;130(11):1859-63. doi:  
732 10.1242/jcs.192997. PubMed PMID: 28455413.
- 733 2. Kaneda R, Saeki Y, Getachew D, Matsumoto A, Furuya M, Ogawa N, et al. Interkinetic  
734 nuclear migration in the tracheal and esophageal epithelia of the mouse embryo: Possible  
735 implications for tracheo-esophageal anomalies. *Congenit Anom (Kyoto)*. 2018;58(2):62-70.  
736 doi: 10.1111/cga.12241. PubMed PMID: 28782137.
- 737 3. Motoya T, Ogawa N, Nitta T, Rafiq AM, Jahan E, Furuya M, et al. Interkinetic nuclear  
738 migration in the mouse embryonic ureteric epithelium: Possible implication for congenital  
739 anomalies of the kidney and urinary tract. *Congenit Anom (Kyoto)*. 2016;56(3):127-34. doi:  
740 10.1111/cga.12150. PubMed PMID: 26710751.
- 741 4. Spear PC, Erickson CA. Interkinetic nuclear migration: a mysterious process in search  
742 of a function. *Development, growth & differentiation*. 2012;54(3):306-16. doi:  
743 10.1111/j.1440-169X.2012.01342.x. PubMed PMID: 22524603; PubMed Central PMCID:  
744 PMC3357188.
- 745 5. Spear PC, Erickson CA. Apical movement during interkinetic nuclear migration is a  
746 two-step process. *Developmental biology*. 2012;370(1):33-41. doi:  
747 10.1016/j.ydbio.2012.06.031. PubMed PMID: 22884563; PubMed Central PMCID:  
748 PMC3935435.
- 749 6. Kosodo Y, Suetsugu T, Suda M, Mimori-Kiyosue Y, Toida K, Baba SA, et al. Regulation  
750 of interkinetic nuclear migration by cell cycle-coupled active and passive mechanisms in the  
751 developing brain. *The EMBO journal*. 2011;30(9):1690-704. doi: 10.1038/emboj.2011.81.  
752 PubMed PMID: 21441895; PubMed Central PMCID: PMC3101991.
- 753 7. Tsai JW, Lian WN, Kemal S, Kriegstein AR, Vallee RB. Kinesin 3 and cytoplasmic dynein  
754 mediate interkinetic nuclear migration in neural stem cells. *Nature neuroscience*.  
755 2010;13(12):1463-71. doi: 10.1038/nn.2665. PubMed PMID: 21037580; PubMed Central  
756 PMCID: PMC3059207.
- 757 8. Yu J, Lei K, Zhou M, Craft CM, Xu G, Xu T, et al. KASH protein Syne-2/Nesprin-2 and  
758 SUN proteins SUN1/2 mediate nuclear migration during mammalian retinal development.  
759 *Human molecular genetics*. 2011;20(6):1061-73. doi: 10.1093/hmg/ddq549. PubMed PMID:  
760 21177258; PubMed Central PMCID: PMC3043658.
- 761 9. Norden C, Young S, Link BA, Harris WA. Actomyosin is the main driver of interkinetic  
762 nuclear migration in the retina. *Cell*. 2009;138(6):1195-208. doi: 10.1016/j.cell.2009.06.032.  
763 PubMed PMID: 19766571; PubMed Central PMCID: PMC2791877.
- 764 10. Schenk J, Wilsch-Brauninger M, Calegari F, Huttner WB. Myosin II is required for  
765 interkinetic nuclear migration of neural progenitors. *Proceedings of the National Academy of  
766 Sciences of the United States of America*. 2009;106(38):16487-92. doi:  
767 10.1073/pnas.0908928106. PubMed PMID: 19805325; PubMed Central PMCID:  
768 PMC2752599.
- 769 11. Okamoto M, Shinoda T, Kawae T, Nagasaka A, Miyata T. Ferret-mouse differences in  
770 interkinetic nuclear migration and cellular densification in the neocortical ventricular zone.  
771 *Neuroscience research*. 2014;86:88-95. doi: 10.1016/j.neures.2014.03.011. PubMed PMID:  
772 24780233.
- 773 12. Osborne JM, Fletcher AG, Pitt-Francis JM, Maini PK, Gavaghan DJ. Comparing  
774 individual-based approaches to modelling the self-organization of multicellular tissues. *PLoS*



- 775 computational biology. 2017;13(2):e1005387. doi: 10.1371/journal.pcbi.1005387. PubMed  
776 PMID: 28192427; PubMed Central PMCID: PMC5330541.
- 777 13. Ishihara S, Marcq P, Sugimura K. From cells to tissue: A continuum model of epithelial  
778 mechanics. *Phys Rev E*. 2017;96(2-1):022418. doi: 10.1103/PhysRevE.96.022418. PubMed  
779 PMID: 28950595.
- 780 14. Kopf MH, Pismen LM. A continuum model of epithelial spreading. *Soft matter*.  
781 2013;9(14):3727-34. doi: 10.1039/c3sm26955h. PubMed PMID: WOS:000316118300005.
- 782 15. Streichan SJ, Hoerner CR, Schneidt T, Holzer D, Hufnagel L. Spatial constraints control  
783 cell proliferation in tissues. *Proceedings of the National Academy of Sciences of the United  
784 States of America*. 2014;111(15):5586-91. doi: 10.1073/pnas.1323016111. PubMed PMID:  
785 24706777; PubMed Central PMCID: PMC3992650.
- 786 16. Hannezo E, Prost J, Joanny JF. Theory of epithelial sheet morphology in three  
787 dimensions. *Proceedings of the National Academy of Sciences of the United States of  
788 America*. 2014;111(1):27-32. doi: 10.1073/pnas.1312076111. PubMed PMID: 24367079;  
789 PubMed Central PMCID: PMC3890844.
- 790 17. Zimmermann J, Camley BA, Rappel WJ, Levine H. Contact inhibition of locomotion  
791 determines cell-cell and cell-substrate forces in tissues. *Proceedings of the National  
792 Academy of Sciences of the United States of America*. 2016;113(10):2660-5. doi:  
793 10.1073/pnas.1522330113. PubMed PMID: 26903658; PubMed Central PMCID:  
794 PMC4791011.
- 795 18. Alt S, Ganguly P, Salbreux G. Vertex models: from cell mechanics to tissue  
796 morphogenesis. *Philosophical transactions of the Royal Society of London Series B, Biological  
797 sciences*. 2017;372(1720). doi: 10.1098/rstb.2015.0520. PubMed PMID: 28348254; PubMed  
798 Central PMCID: PMC5379026.
- 799 19. Byrne H, Drasdo D. Individual-based and continuum models of growing cell  
800 populations: a comparison. *Journal of mathematical biology*. 2009;58(4-5):657-87. doi:  
801 10.1007/s00285-008-0212-0. PubMed PMID: 18841363.
- 802 20. Scianna M, Preziosi L, Wolf K. A Cellular Potts Model simulating cell migration on and  
803 in matrix environments. *Math Biosci Eng*. 2013;10(1):235-61. doi: 10.3934/mbe.2013.10.235.  
804 PubMed PMID: 23311371.
- 805 21. Plank MJ, Simpson MJ. Models of collective cell behaviour with crowding effects:  
806 comparing lattice-based and lattice-free approaches. *Journal of the Royal Society, Interface /  
807 the Royal Society*. 2012;9(76):2983-96. doi: 10.1098/rsif.2012.0319. PubMed PMID:  
808 22696488; PubMed Central PMCID: PMC3479911.
- 809 22. Meinecke L, Eriksson M. Excluded volume effects in on- and off-lattice reaction-  
810 diffusion models. *Iet Syst Biol*. 2017;11(2):55-64. doi: 10.1049/iet-syb.2016.0021. PubMed  
811 PMID: WOS:000398811200001.
- 812 23. Farhadifar R, Roper JC, Aigouy B, Eaton S, Julicher F. The influence of cell mechanics,  
813 cell-cell interactions, and proliferation on epithelial packing. *Current biology : CB*.  
814 2007;17(24):2095-104. doi: 10.1016/j.cub.2007.11.049. PubMed PMID: 18082406.
- 815 24. Fletcher AG, Osterfield M, Baker RE, Shvartsman SY. Vertex models of epithelial  
816 morphogenesis. *Biophysical journal*. 2014;106(11):2291-304. doi:  
817 10.1016/j.bpj.2013.11.4498. PubMed PMID: 24896108; PubMed Central PMCID:  
818 PMC4052277.
- 819 25. Staple DB, Farhadifar R, Roper JC, Aigouy B, Eaton S, Julicher F. Mechanics and  
820 remodelling of cell packings in epithelia. *Eur Phys J E Soft Matter*. 2010;33(2):117-27. doi:  
821 10.1140/epje/i2010-10677-0. PubMed PMID: 21082210.

- 822 26. Bock M, Tyagi AK, Kreft JU, Alt W. Generalized Voronoi Tessellation as a Model of  
823 Two-dimensional Cell Tissue Dynamics. *Bulletin of mathematical biology*. 2010;72(7):1696-  
824 731. doi: 10.1007/s11538-009-9498-3. PubMed PMID: WOS:000282427900003.
- 825 27. Meineke FA, Potten CS, Loeffler M. Cell migration and organization in the intestinal  
826 crypt using a lattice-free model. *Cell proliferation*. 2001;34(4):253-66. doi: DOI  
827 10.1046/j.0960-7722.2001.00216.x. PubMed PMID: WOS:000170564500006.
- 828 28. Hamburger V, Hamilton HL. A series of normal stages in the development of the chick  
829 embryo. 1951. *Developmental dynamics : an official publication of the American Association  
830 of Anatomists*. 1992;195(4):231-72. doi: 10.1002/aja.1001950404. PubMed PMID: 1304821.
- 831 29. Strzyz PJ, Matejczic M, Norden C. Heterogeneity, Cell Biology and Tissue Mechanics of  
832 Pseudostratified Epithelia: Coordination of Cell Divisions and Growth in Tightly Packed  
833 Tissues. *Int Rev Cell Mol Biol*. 2016;325:89-118. doi: 10.1016/bs.ircmb.2016.02.004. PubMed  
834 PMID: 27241219.
- 835 30. Van Liedekerke P, Palm MM, Jagiella N, Drasdo D. Simulating tissue mechanics with  
836 agent-based models: concepts, perspectives and some novel results. *Comput Part Mech*.  
837 2015;2(4):401-44. doi: 10.1007/s40571-015-0082-3. PubMed PMID:  
838 WOS:000417453500008.
- 839 31. Pfisterer K, Jayo A, Parsons M. Control of nuclear organization by F-actin binding  
840 proteins. *Nucleus*. 2017;8(2):126-33. doi: 10.1080/19491034.2016.1267093. PubMed PMID:  
841 28060557; PubMed Central PMCID: PMC5403142.
- 842 32. Zlotek-Zlotkiewicz E, Monnier S, Cappello G, Le Berre M, Piel M. Optical volume and  
843 mass measurements show that mammalian cells swell during mitosis. *The Journal of cell  
844 biology*. 2015;211(4):765-74. doi: 10.1083/jcb.201505056. PubMed PMID: 26598614;  
845 PubMed Central PMCID: PMC54657168.
- 846 33. Son S, Kang JH, Oh S, Kirschner MW, Mitchison TJ, Manalis S. Resonant microchannel  
847 volume and mass measurements show that suspended cells swell during mitosis. *The Journal  
848 of cell biology*. 2015;211(4):757-63. doi: 10.1083/jcb.201505058. PubMed PMID: 26598613;  
849 PubMed Central PMCID: PMC54657169.
- 850 34. Degond P, Ferreira MA, Motsch S. Damped Arrow-Hurwicz algorithm for sphere  
851 packing. *J Comput Phys*. 2017;332:47-65. doi: 10.1016/j.jcp.2016.11.047. PubMed PMID:  
852 WOS:000393250800003.
- 853 35. Molina A, Pituello F. Playing with the cell cycle to build the spinal cord.  
854 *Developmental biology*. 2017;432(1):14-23. doi: 10.1016/j.ydbio.2016.12.022. PubMed  
855 PMID: 28034699.
- 856 36. St Johnston D, Sanson B. Epithelial polarity and morphogenesis. *Current opinion in  
857 cell biology*. 2011;23(5):540-6. doi: 10.1016/j.ceb.2011.07.005. PubMed PMID: 21807488.
- 858 37. Ladoux B, Mege RM, Trepast X. Front-Rear Polarization by Mechanical Cues: From  
859 Single Cells to Tissues. *Trends in cell biology*. 2016;26(6):420-33. doi:  
860 10.1016/j.tcb.2016.02.002. PubMed PMID: 26920934; PubMed Central PMCID:  
861 PMC5421599.
- 862 38. McShane SG, Mole MA, Savery D, Greene ND, Tam PP, Copp AJ. Cellular basis of  
863 neuroepithelial bending during mouse spinal neural tube closure. *Developmental biology*.  
864 2015;404(2):113-24. doi: 10.1016/j.ydbio.2015.06.003. PubMed PMID: 26079577; PubMed  
865 Central PMCID: PMC54528075.
- 866 39. Sausedo RA, Smith JL, Schoenwolf GC. Role of nonrandomly oriented cell division in  
867 shaping and bending of the neural plate. *The Journal of comparative neurology*.  
868 1997;381(4):473-88. PubMed PMID: 9136804.

- 869 40. Miyata T, Okamoto M, Shinoda T, Kawaguchi A. Interkinetic nuclear migration  
870 generates and opposes ventricular-zone crowding: insight into tissue mechanics. *Frontiers in*  
871 *cellular neuroscience*. 2014;8:473. doi: 10.3389/fncel.2014.00473. PubMed PMID:  
872 25674051; PubMed Central PMCID: PMCPMC4309187.
- 873 41. Hiscock TW, Miesfeld JB, Mosaliganti KR, Link BA, Megason SG. Feedback between  
874 tissue packing and neurogenesis in the zebrafish neural tube. *Development*. 2018;145(9).  
875 doi: 10.1242/dev.157040. PubMed PMID: 29678815; PubMed Central PMCID:  
876 PMCPMC5992593.
- 877 42. Kinoshita N, Sasai N, Misaki K, Yonemura S. Apical accumulation of Rho in the neural  
878 plate is important for neural plate cell shape change and neural tube formation. *Molecular*  
879 *biology of the cell*. 2008;19(5):2289-99. doi: 10.1091/mbc.E07-12-1286. PubMed PMID:  
880 18337466; PubMed Central PMCID: PMCPMC2366863.
- 881 43. Copp AJ. Neurulation in the cranial region--normal and abnormal. *Journal of*  
882 *anatomy*. 2005;207(5):623-35. doi: 10.1111/j.1469-7580.2005.00476.x. PubMed PMID:  
883 16313396; PubMed Central PMCID: PMCPMC1571567.
- 884 44. Schoenwolf GC, Franks MV. Quantitative analyses of changes in cell shapes during  
885 bending of the avian neural plate. *Developmental biology*. 1984;105(2):257-72. PubMed  
886 PMID: 6479439.
- 887 45. Smith JL, Schoenwolf GC, Quan J. Quantitative analyses of neuroepithelial cell shapes  
888 during bending of the mouse neural plate. *The Journal of comparative neurology*.  
889 1994;342(1):144-51. doi: 10.1002/cne.903420113. PubMed PMID: 8207124.
- 890 46. Mitsuhashi T, Takahashi T. Genetic regulation of proliferation/differentiation  
891 characteristics of neural progenitor cells in the developing neocortex. *Brain & development*.  
892 2009;31(7):553-7. doi: 10.1016/j.braindev.2009.05.002. PubMed PMID: 19464833.
- 893 47. Yamada M, Udagawa J, Hashimoto R, Matsumoto A, Hatta T, Otani H. Interkinetic  
894 nuclear migration during early development of midgut and ureteric epithelia. *Anat Sci Int*.  
895 2013;88(1):31-7. doi: 10.1007/s12565-012-0156-8. PubMed PMID: 23054939.
- 896 48. Reiner O, Sapir T. LIS1 functions in normal development and disease. *Current opinion*  
897 *in neurobiology*. 2013;23(6):951-6. doi: 10.1016/j.conb.2013.08.001. PubMed PMID:  
898 23973156.
- 899 49. Doobin DJ, Dantas TJ, Vallee RB. Microcephaly as a cell cycle disease. *Cell cycle*.  
900 2017;16(3):247-8. doi: 10.1080/15384101.2016.1252591. PubMed PMID: 27792466;  
901 PubMed Central PMCID: PMCPMC5345203.

902

903

904

905



## 907 Supporting Information captions

908 **S1 Figure. Anteroposterior growth from the forelimb to the tail bud from 2 to 4 days of**

909 **development.** A. Representative images of chicken embryos at stage HH13-, 18 and 23

910 corresponding to 48, 72 and 96 hours of incubation. The cephalic region of the embryo at

911 stage HH18 removed prior to the picture. The green dotted line indicates the regions that was

912 measured. B, plot of the mean length of the portion indicated in green in panel A. Dots

913 represent the mean, error bars indicate standard deviation.

914

915 **S2 Figure. Maintenance of neuroepithelial architecture requires actomyosin contractility.** A,

916 Explants of the trunk are incubated in suspension with culture medium, culture medium with

917 DMSO or culture medium with ROCK inhibitor (Y27632, 400 $\mu$ M). B, Transversal sections with

918 nuclear (DAPI, grey) and actin staining (Phalloidin, green). C, apicobasal length. D, number of

919 pseudolayers of nuclei. E, straightness of the apical domain. F, shape of nuclei. G, position of

920 mitoses, at scale with the tissue. H, position of mitoses, raw data (n48h=42, n72h=66,

921 n96h=153; Kruskal-Wallis followed by multiple comparisons; \*\*\*\*,  $p < 0.0001$ ). Box and

922 whiskers plot: the box extends from the 25th to the 75th percentile; the whiskers show the

923 extent of the whole dataset. The median is plotted as a line inside the box.

924

925 **S3 Figure. INM opposes apicobasal elongation, even with high random nuclear noise.** A, Mean

926 apicobasal (AB, open circle) and nuclear-basal (N, closed circles) lengths with normal INM

927 (black) and low INM (red). Note that mean tissue heights goes from 75 $\mu$ m to 89 $\mu$ m in absence

928 of INM. In the meantime, mean nuclear heights goes from 51 $\mu$ m to 48 $\mu$ m representing a shift

929 from being located within the most apical top third of the tissue with normal INM (51 $\mu$ m

930 /75 $\mu$ m =68%) to being located midway between the apical and basal domains

931 (48 $\mu$ m/89 $\mu$ m=54%). B-C, Mean width of apical (magenta), nuclear (black) and basal domain  
932 (cyan) domains with normal INM (B) or low INM conditions (C). Note that low INM conditions  
933 lead to a shrinkage of the apical domain (arrow). Error bars represent standard deviation.

934

935 **S1 Table. List of parameters used in each simulations presented on Figs 3-5, 7 and S3.** Yellow,  
936 passive apical-apical springs; Green, contractile apical-apical springs; blue frame, fast update  
937 of basal points; magenta, high random nuclear movement (noise); light grey, no proliferation  
938 and no INM; dark grey, low INM; bold text, normal INM conditions. The following parameters  
939 were common to all simulations: radius of nucleus soft core ( $R_s=5\mu$ m), radius of nucleus hard  
940 core ( $R_{h\_S}=1.5\mu$ m), radius of nucleus hard core during mitosis ( $R_{h\_M}=3.5\mu$ m), maximum  
941 distance between two consecutive apical points ( $a_0=1/6*R_s$ ), maximum distance between  
942 two consecutive basal points ( $b_0=1/6*R_s$ ). The relative strengths of the various forces was set  
943 as follows: stiffness of soft core of the nucleus ( $\alpha_X=1$ ), stiffness of apical-nucleus spring  
944 ( $\alpha_{aX}=2$ ), stiffness of nucleus-basal spring ( $\alpha_{bX}=2$ ), stiffness of apical-apical spring  
945 ( $\alpha_{aS}=5$ ), stiffness of apical-apical spring during G2 phase and mitosis ( $\alpha_{aM}=10$ ),  
946 magnitude of the apical-nucleus-basal alignment force ( $\alpha_{ab}=15$ ).

947

948 **S1 Movie (related to Figure 2).** Mosaic expression of membrane-GFP (green) and membrane-  
949 mCherry (red) into the chick neuroepithelium at stage HH14 at the level of the intermediate  
950 neural tube. Nuclei are counterstained with DAPI (grey).

951

952 **S2 Movie (related to Figures 3 and 4).** All simulations start with 30 cells. Exclusion rate of  
953 daughter cells is set to 50% keeping the total cell number constant. Top panels: simulations  
954 with passive apical-apical springs without INM (left), with low INM (middle), with normal INM

955 (right). Bottom panels: simulations with contractile apical-apical springs without INM (left),  
956 with low INM (middle), with normal INM (right). Note that in absence of INM there is a rapid  
957 shrinkage of the apical domain giving the tissue a pyramidal shape. Also, INM leads the rapid  
958 emergence of a low nuclear density region basally. Only hard cores of nuclei, apical points and  
959 basal points are represented. Soft cores of nuclei and springs are not displayed. Red, cells in  
960 mitosis; yellow cells in PRAM/active G2; black line, tracking of nuclei in PRAM/G2 and M. Each  
961 frame corresponds to one iteration of the simulation (circa. 6 minutes of biological time).  
962 Total duration 480 iterations (48h of biological time).

963

964 **S3 Movie (related to Figure 5).** All simulations start with 30 cells with normal INM. From left to  
965 right, exclusion rate of daughter cells is set to 50% (constant cell number), 40%, 30%, 0% (all  
966 daughter cells added to the 2D plane). Top panels: simulations with passive apical-apical  
967 springs. Bottom panels: simulations with contractile apical-apical springs. Note that  
968 contractile apical springs mitigates buckling of the apical domain and feeds back into basal  
969 rearrangements. Red, cells in mitosis; yellow cells in PRAM/active G2; black line, tracking of  
970 nuclei in PRAM/G2 and M. Each frame corresponds to one iteration of the simulation (circa. 6  
971 minutes of biological time). Total duration 480 iterations (48h of biological time).

972

973 **S4 Movie (related to figure 7).** All simulations start with 30 cells with normal INM and a 25-  
974 fold increase of random nuclear displacement at each iteration (noise) compared to previous  
975 simulations. From left to right, exclusion rate of daughter cells is set to 50% (constant cell  
976 number), 40% and 30%. The fourth condition at the far-right is with 30% of exclusion rate and  
977 fast update of basal points. Note that the global non-oriented force generated by increased  
978 noise is converted into apicobasal elongation. Also, allowing fast reorganization of the basal

979 points promotes isotropic expansion of the apical and basal domain. Red, cells in mitosis;  
980 yellow, cells in PRAM/active G2; black line, tracking of nuclei in PRAM/G2 and M. Each frame  
981 corresponds to one iteration of the simulation (circa. 6 minutes of biological time). Total  
982 duration 480 iterations (48h of biological time).

983

984 **S5 Movie (related to Supplementary Figure 3).** Simulations start with 30 cells. Exclusion rate is  
985 set to 50% (constant cell number). Left panel, normal INM. Right panel, low INM conditions.  
986 Note that without normal INM the apicobasal expansion is faster and that there is a shrinkage  
987 of the apical domain.

988

989 **Supplementary Information.** This file contains the details about the mathematical model.

990



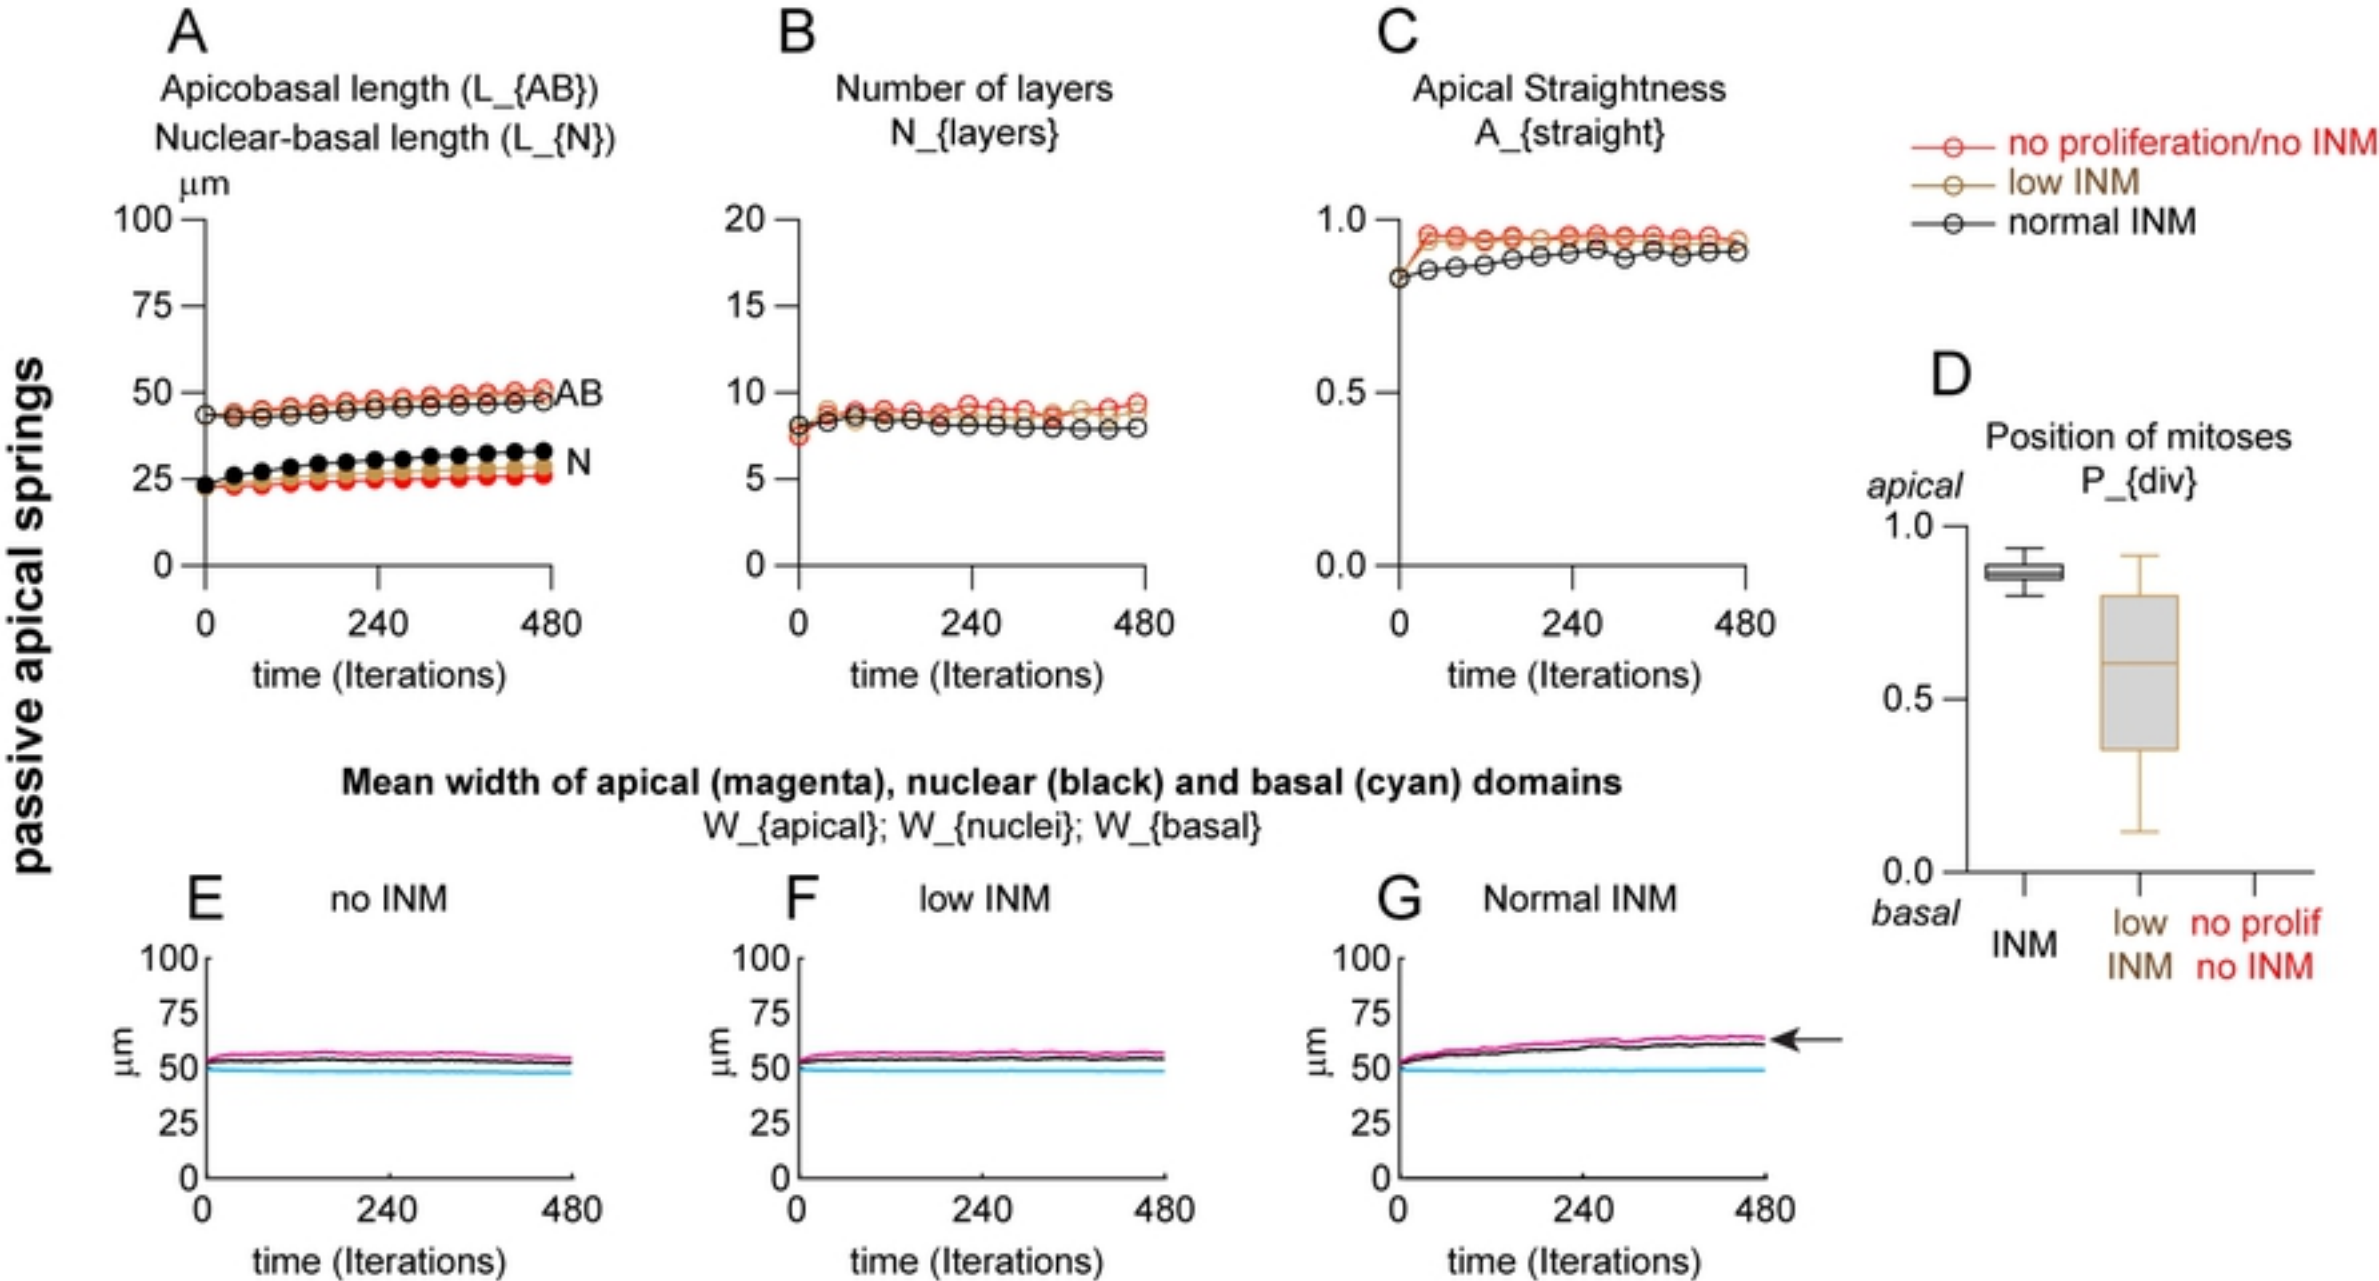

Figure 3

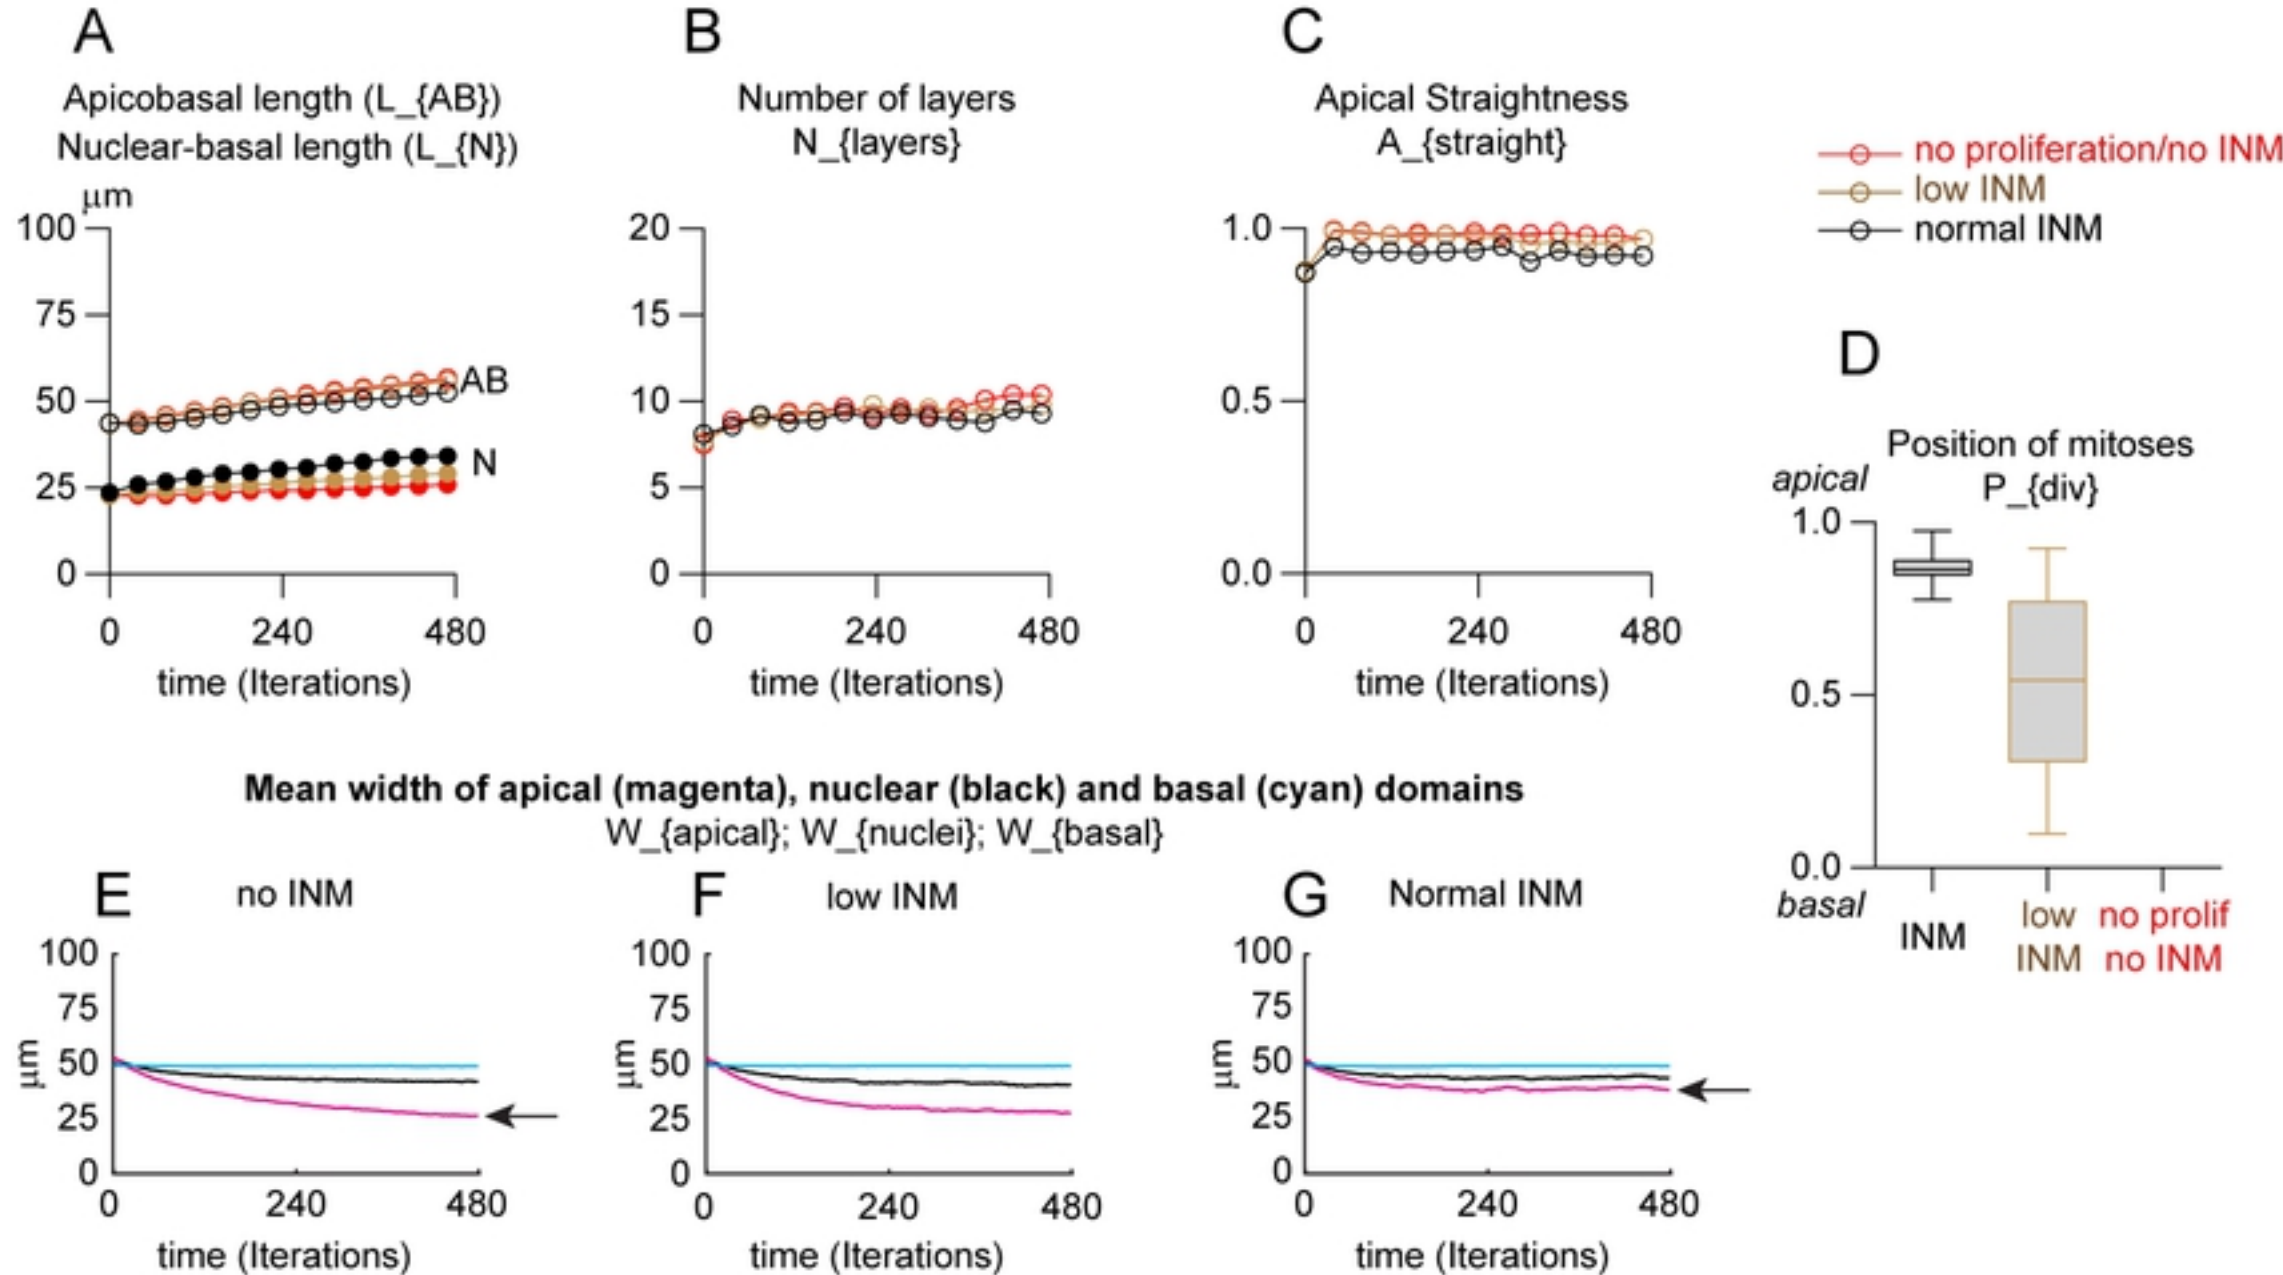

Figure 4

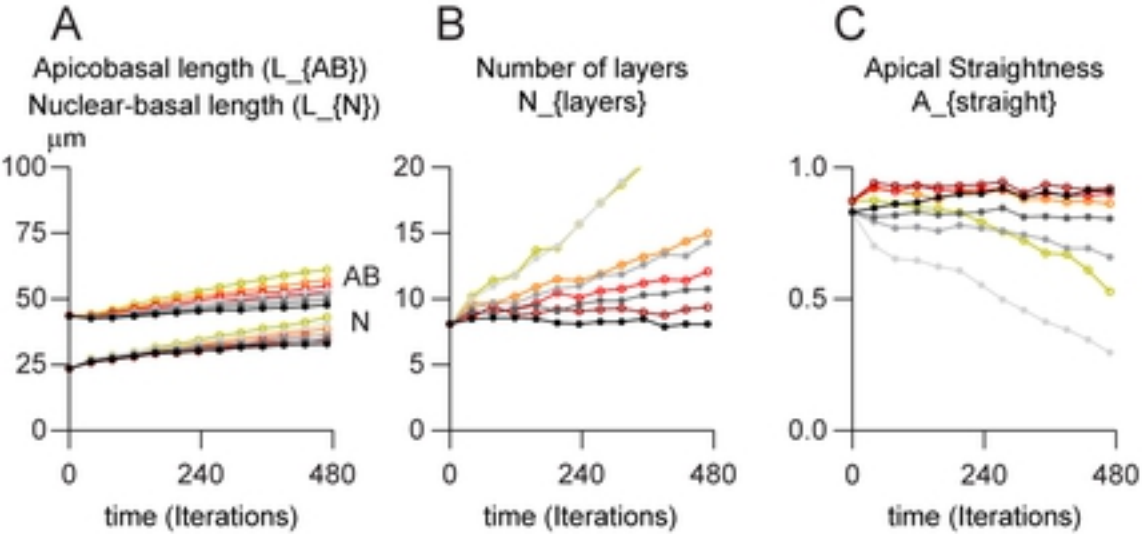

**Passive apical springs**

Exclusion rates

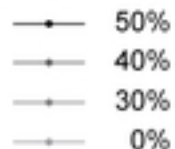

**Contractile apical springs**

Exclusion rates

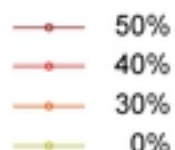

**Mean width of apical (magenta), nuclear (black) and basal (cyan) domains**

$W_{\text{apical}}$ ;  $W_{\text{nuclei}}$ ;  $W_{\text{basal}}$

Different exclusion of daughter cells out of 2D-plane

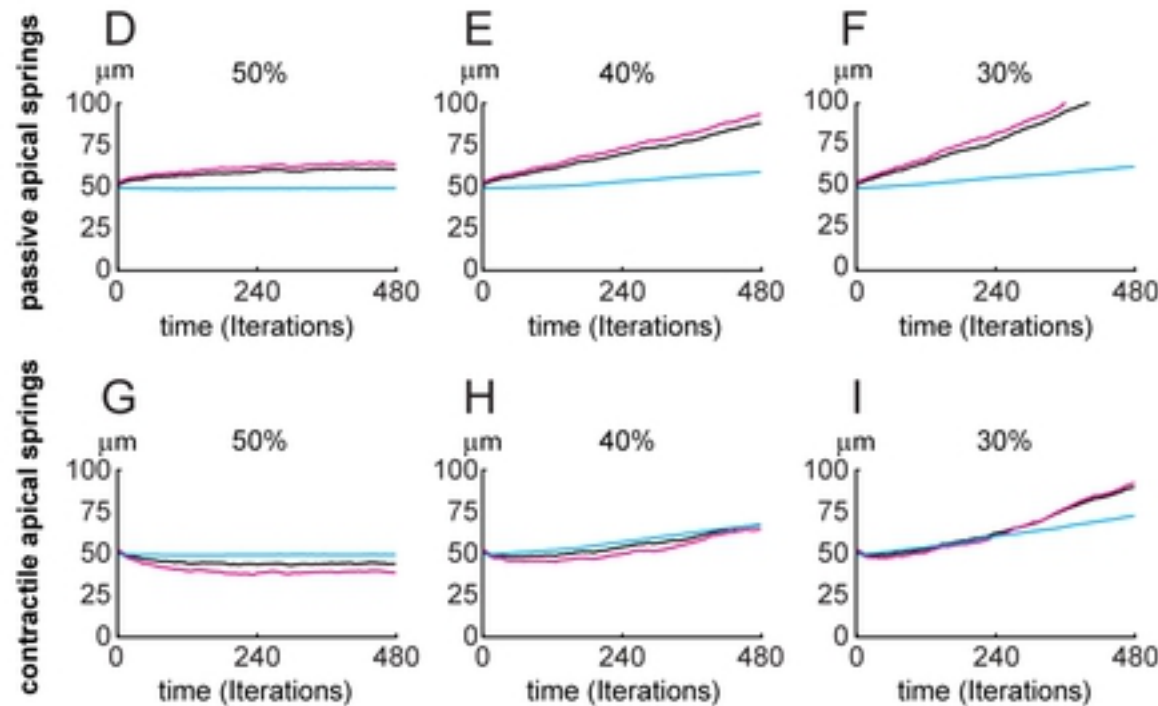

Figure 5

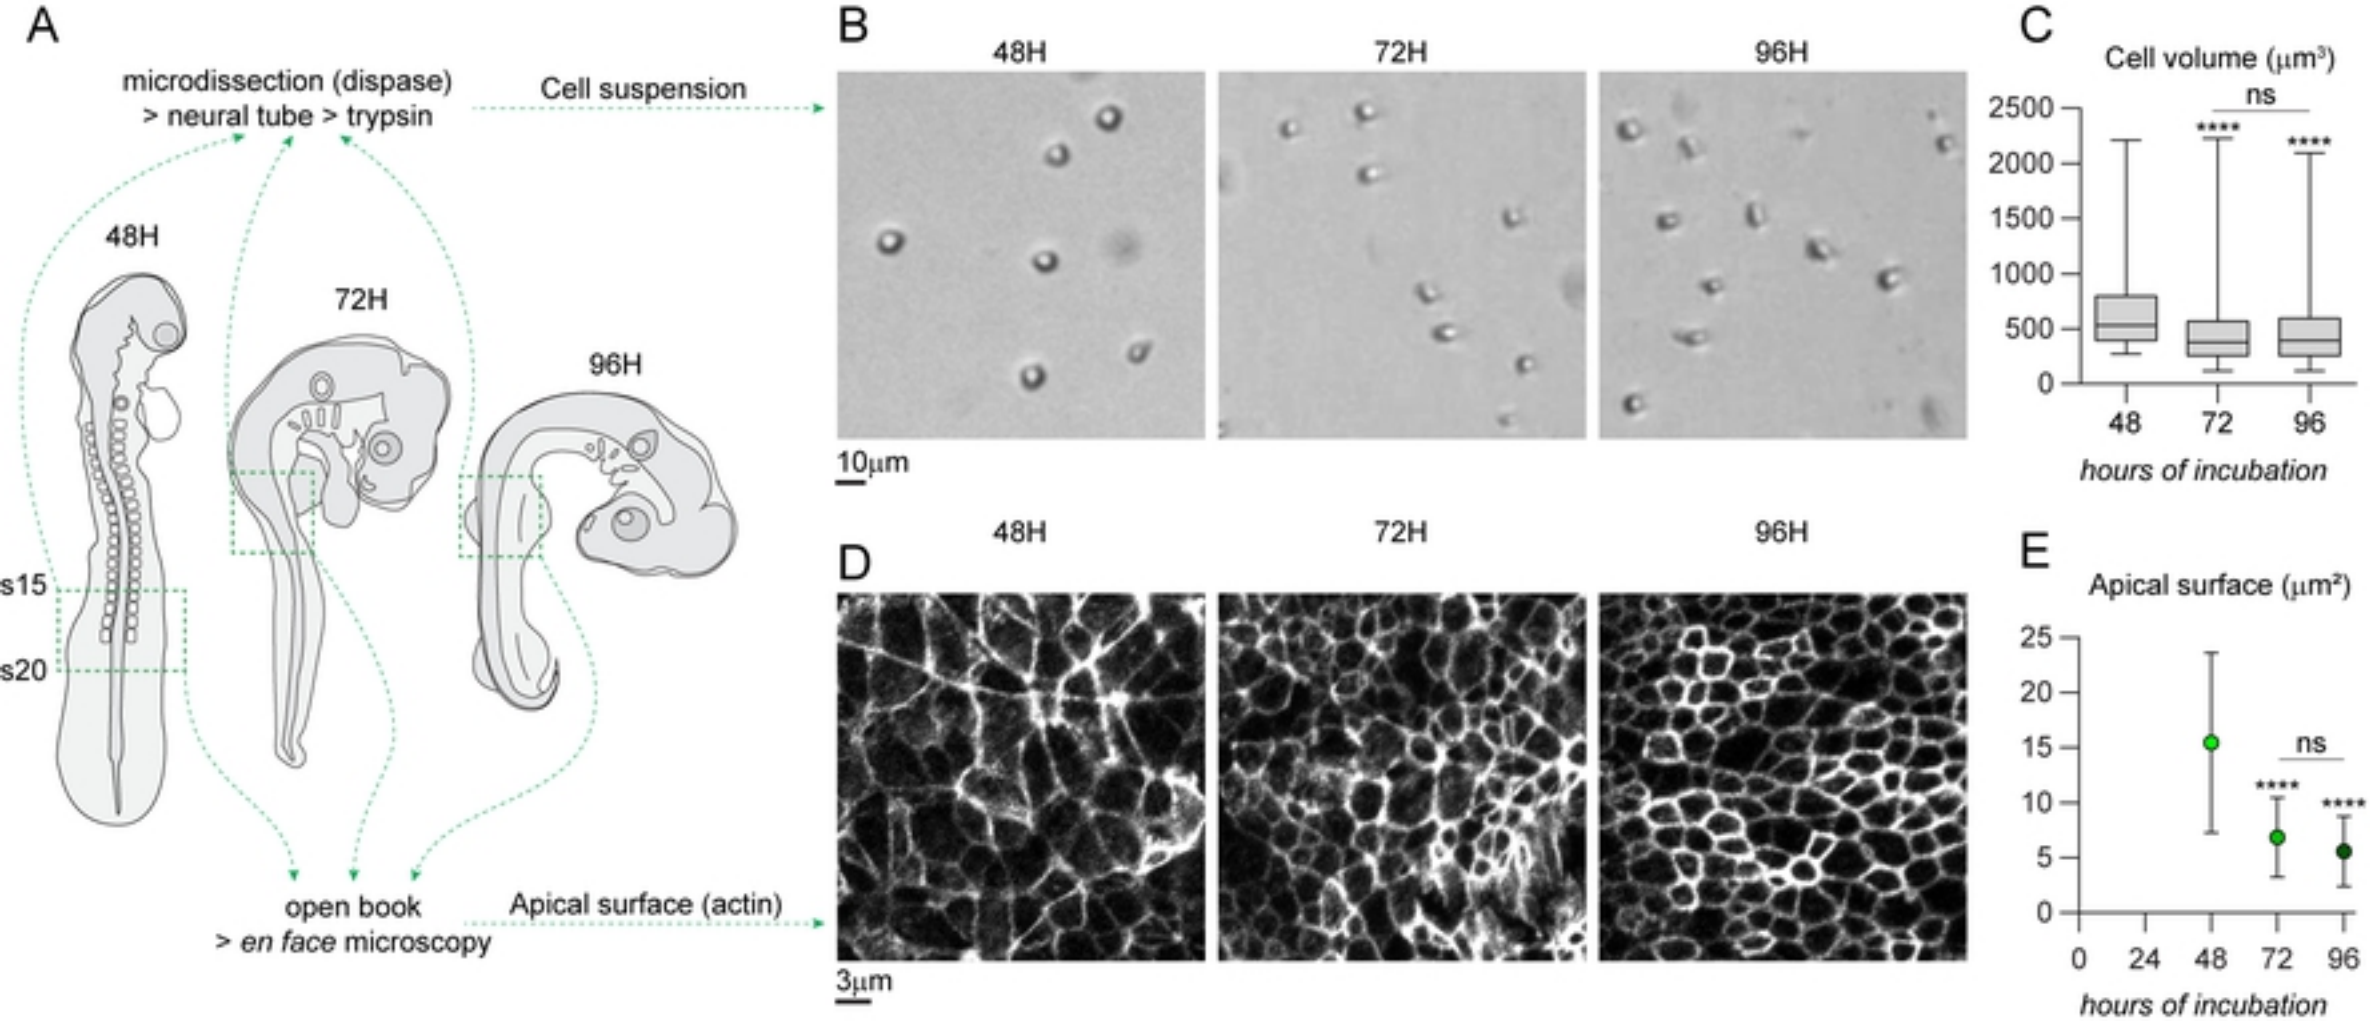

Figure 6

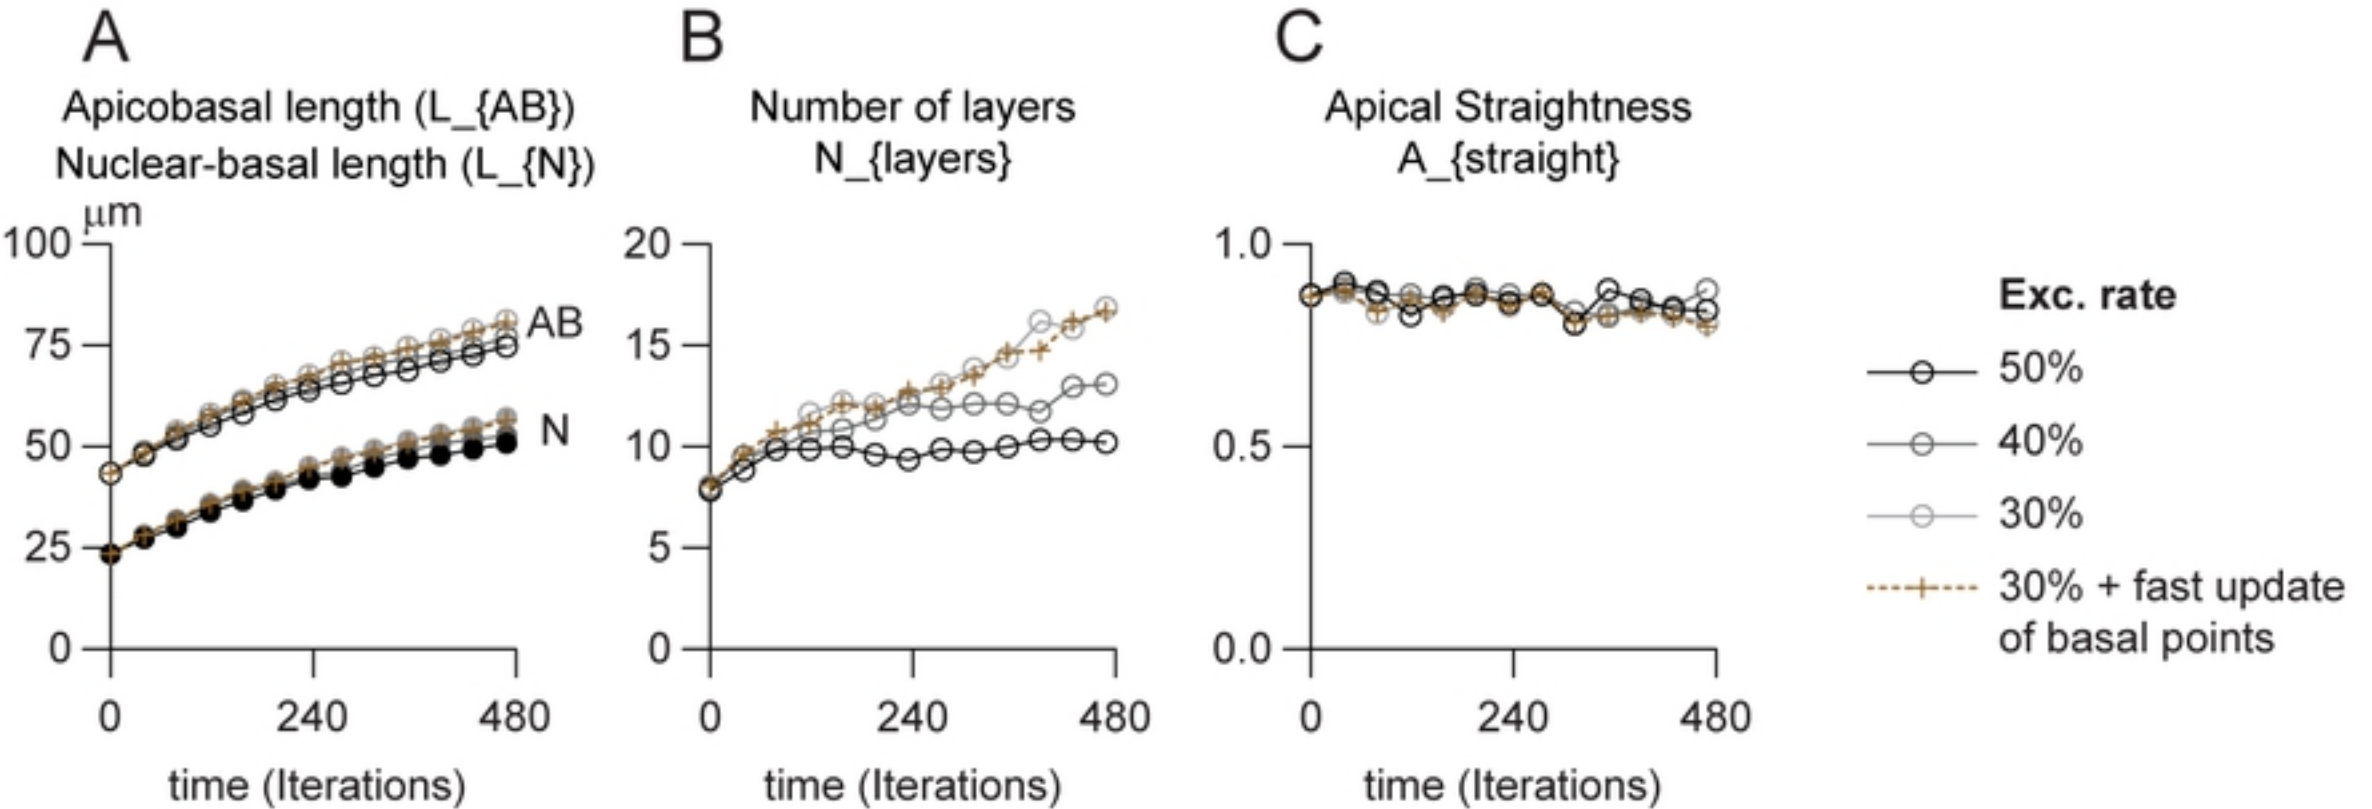

**Mean width of apical (magenta), nuclear (black) and basal (cyan) domains**  
 $W_{\{apical\}}; W_{\{nuclei\}}; W_{\{basal\}}$

slow update of basal points

fast update of basal points

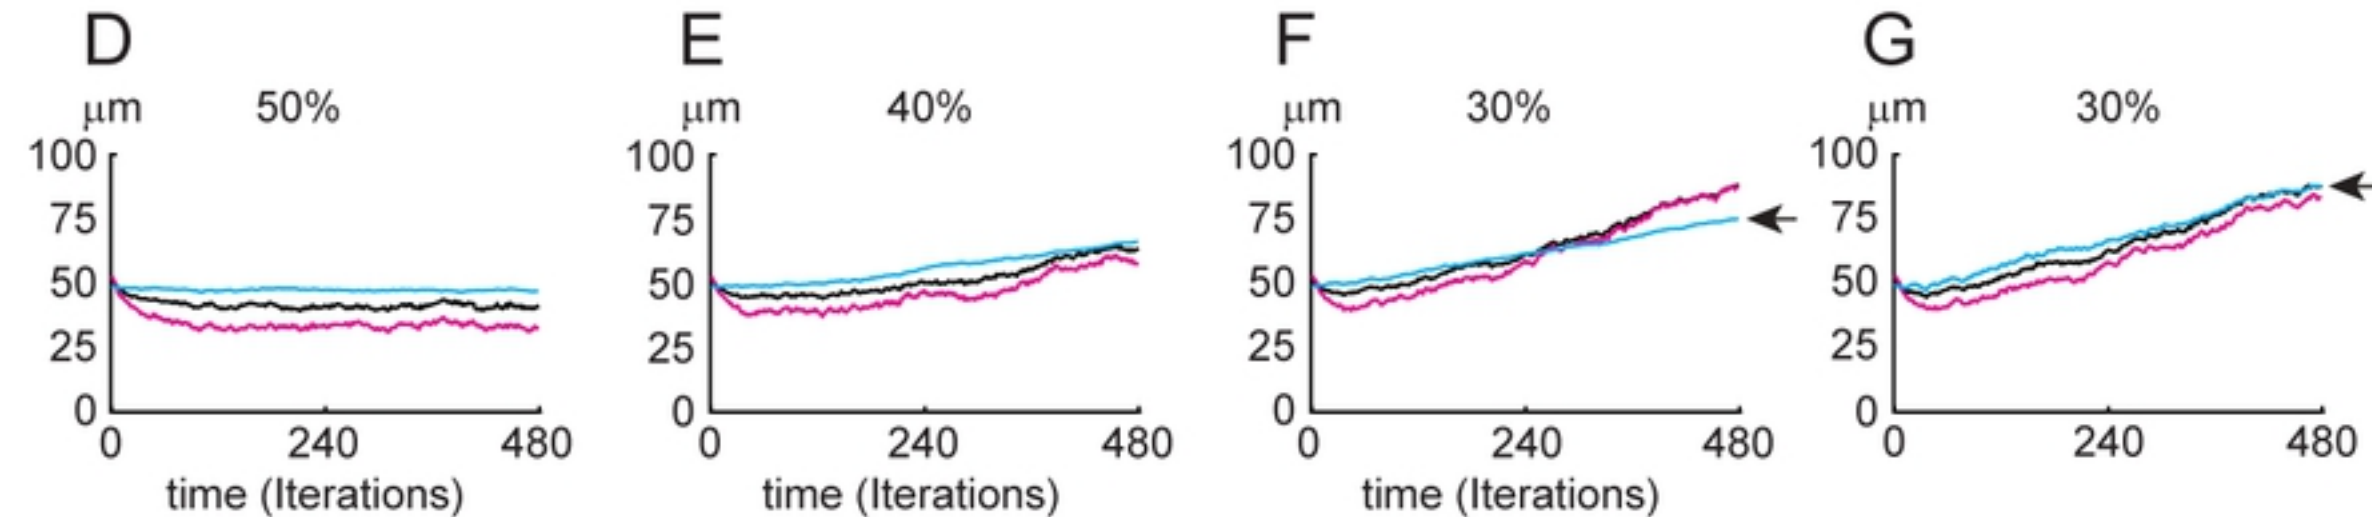

Figure 7

*Proliferation*

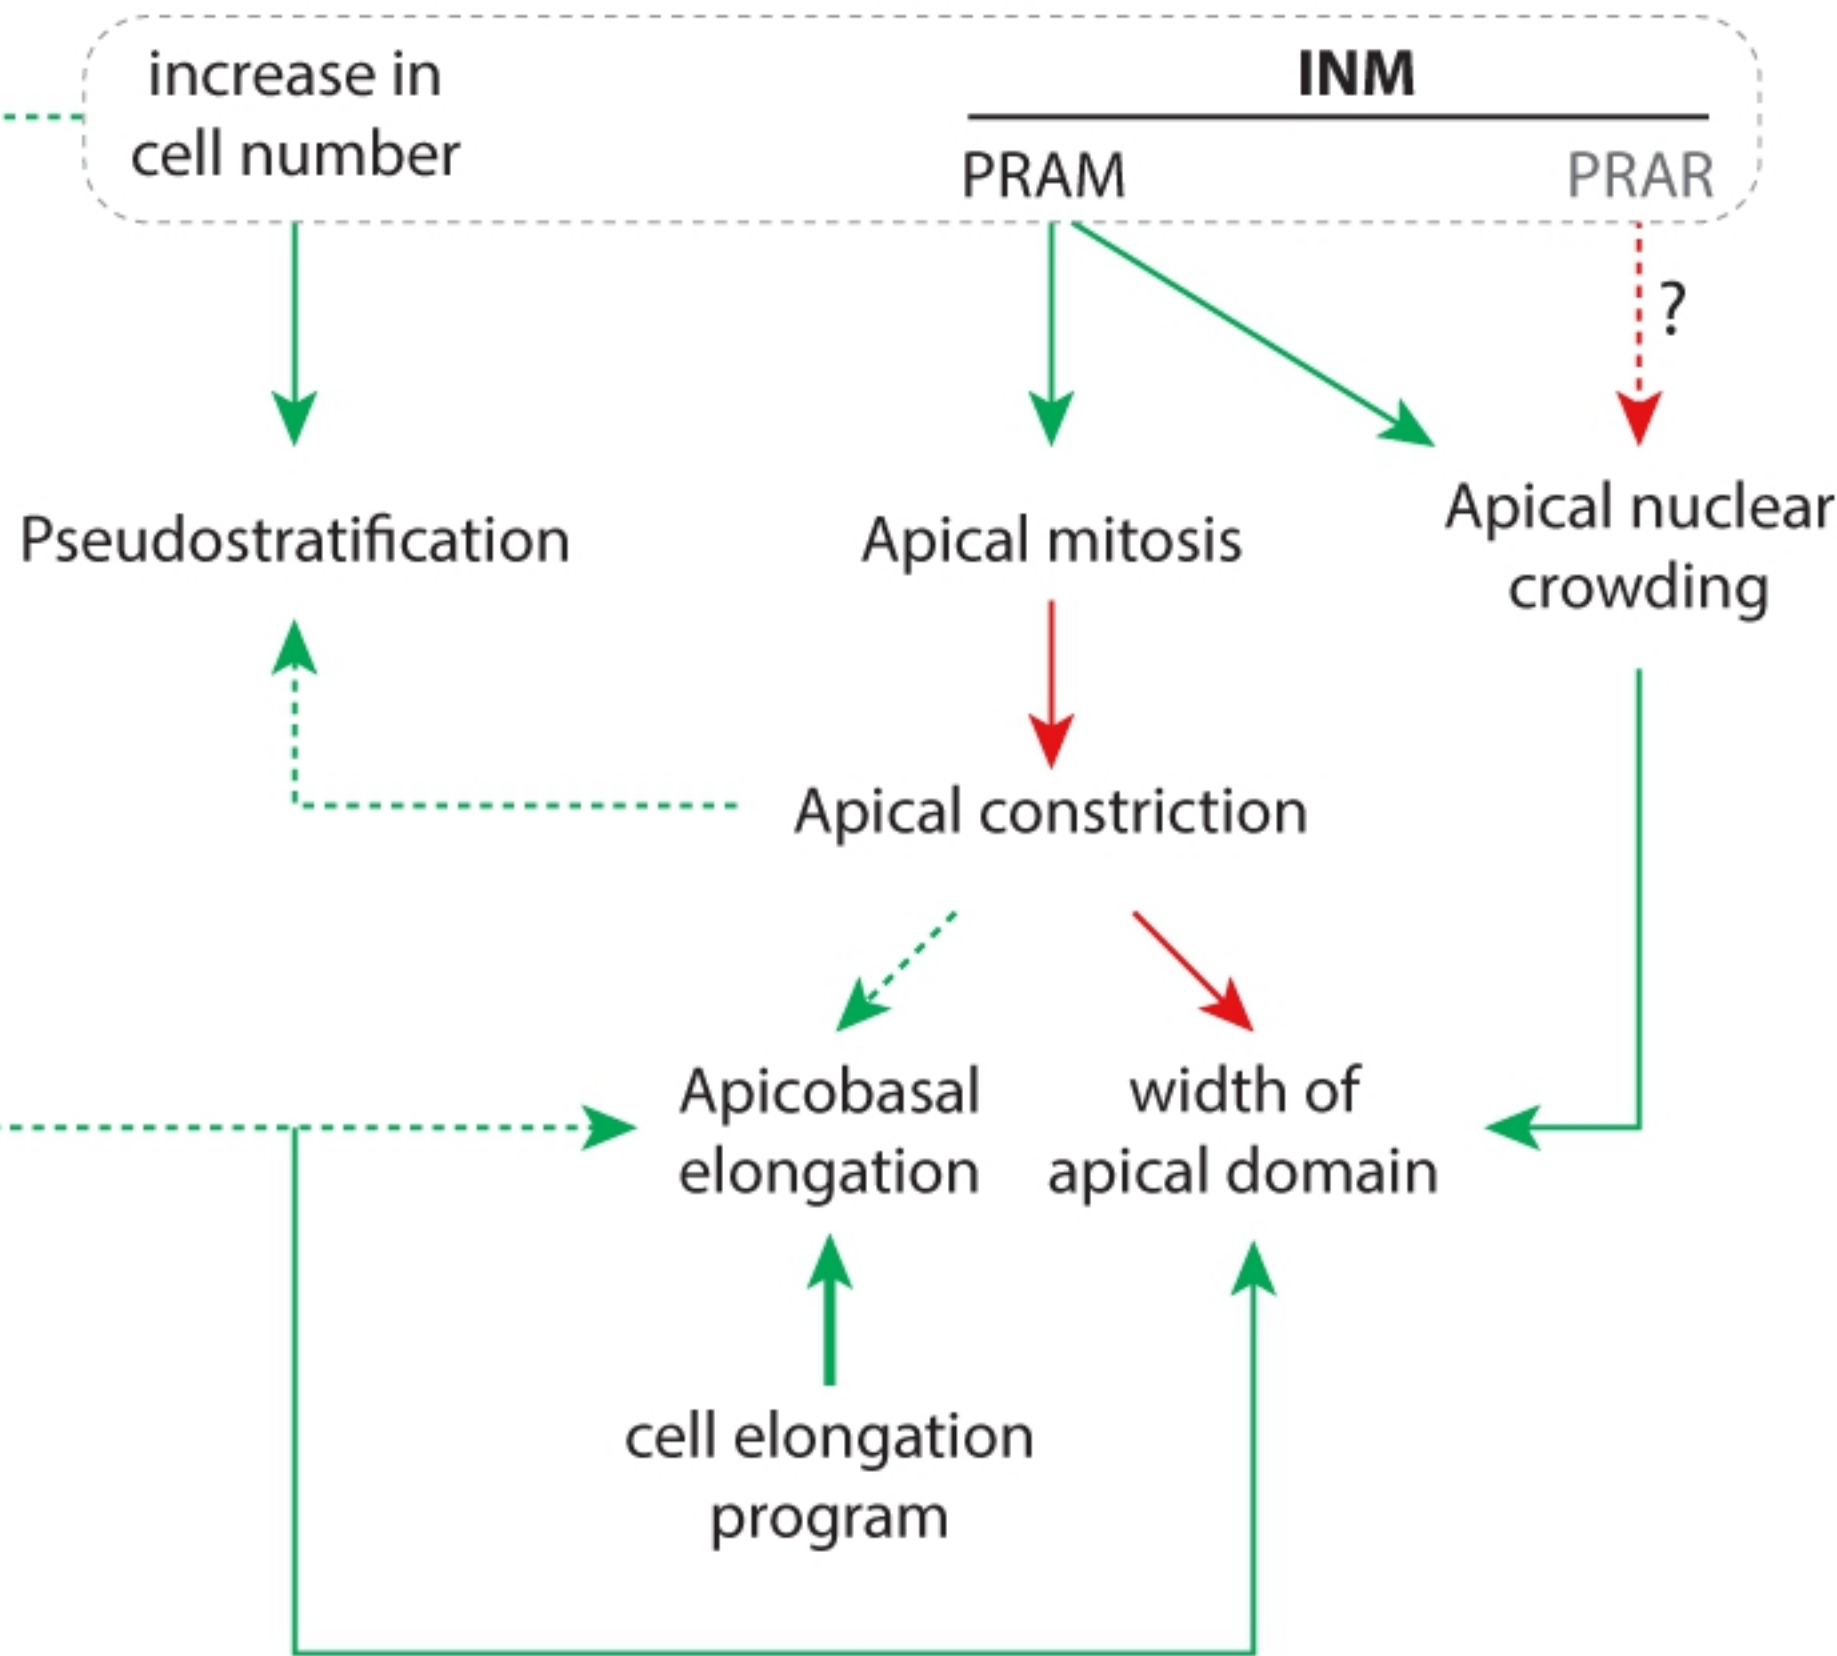

Figure 8

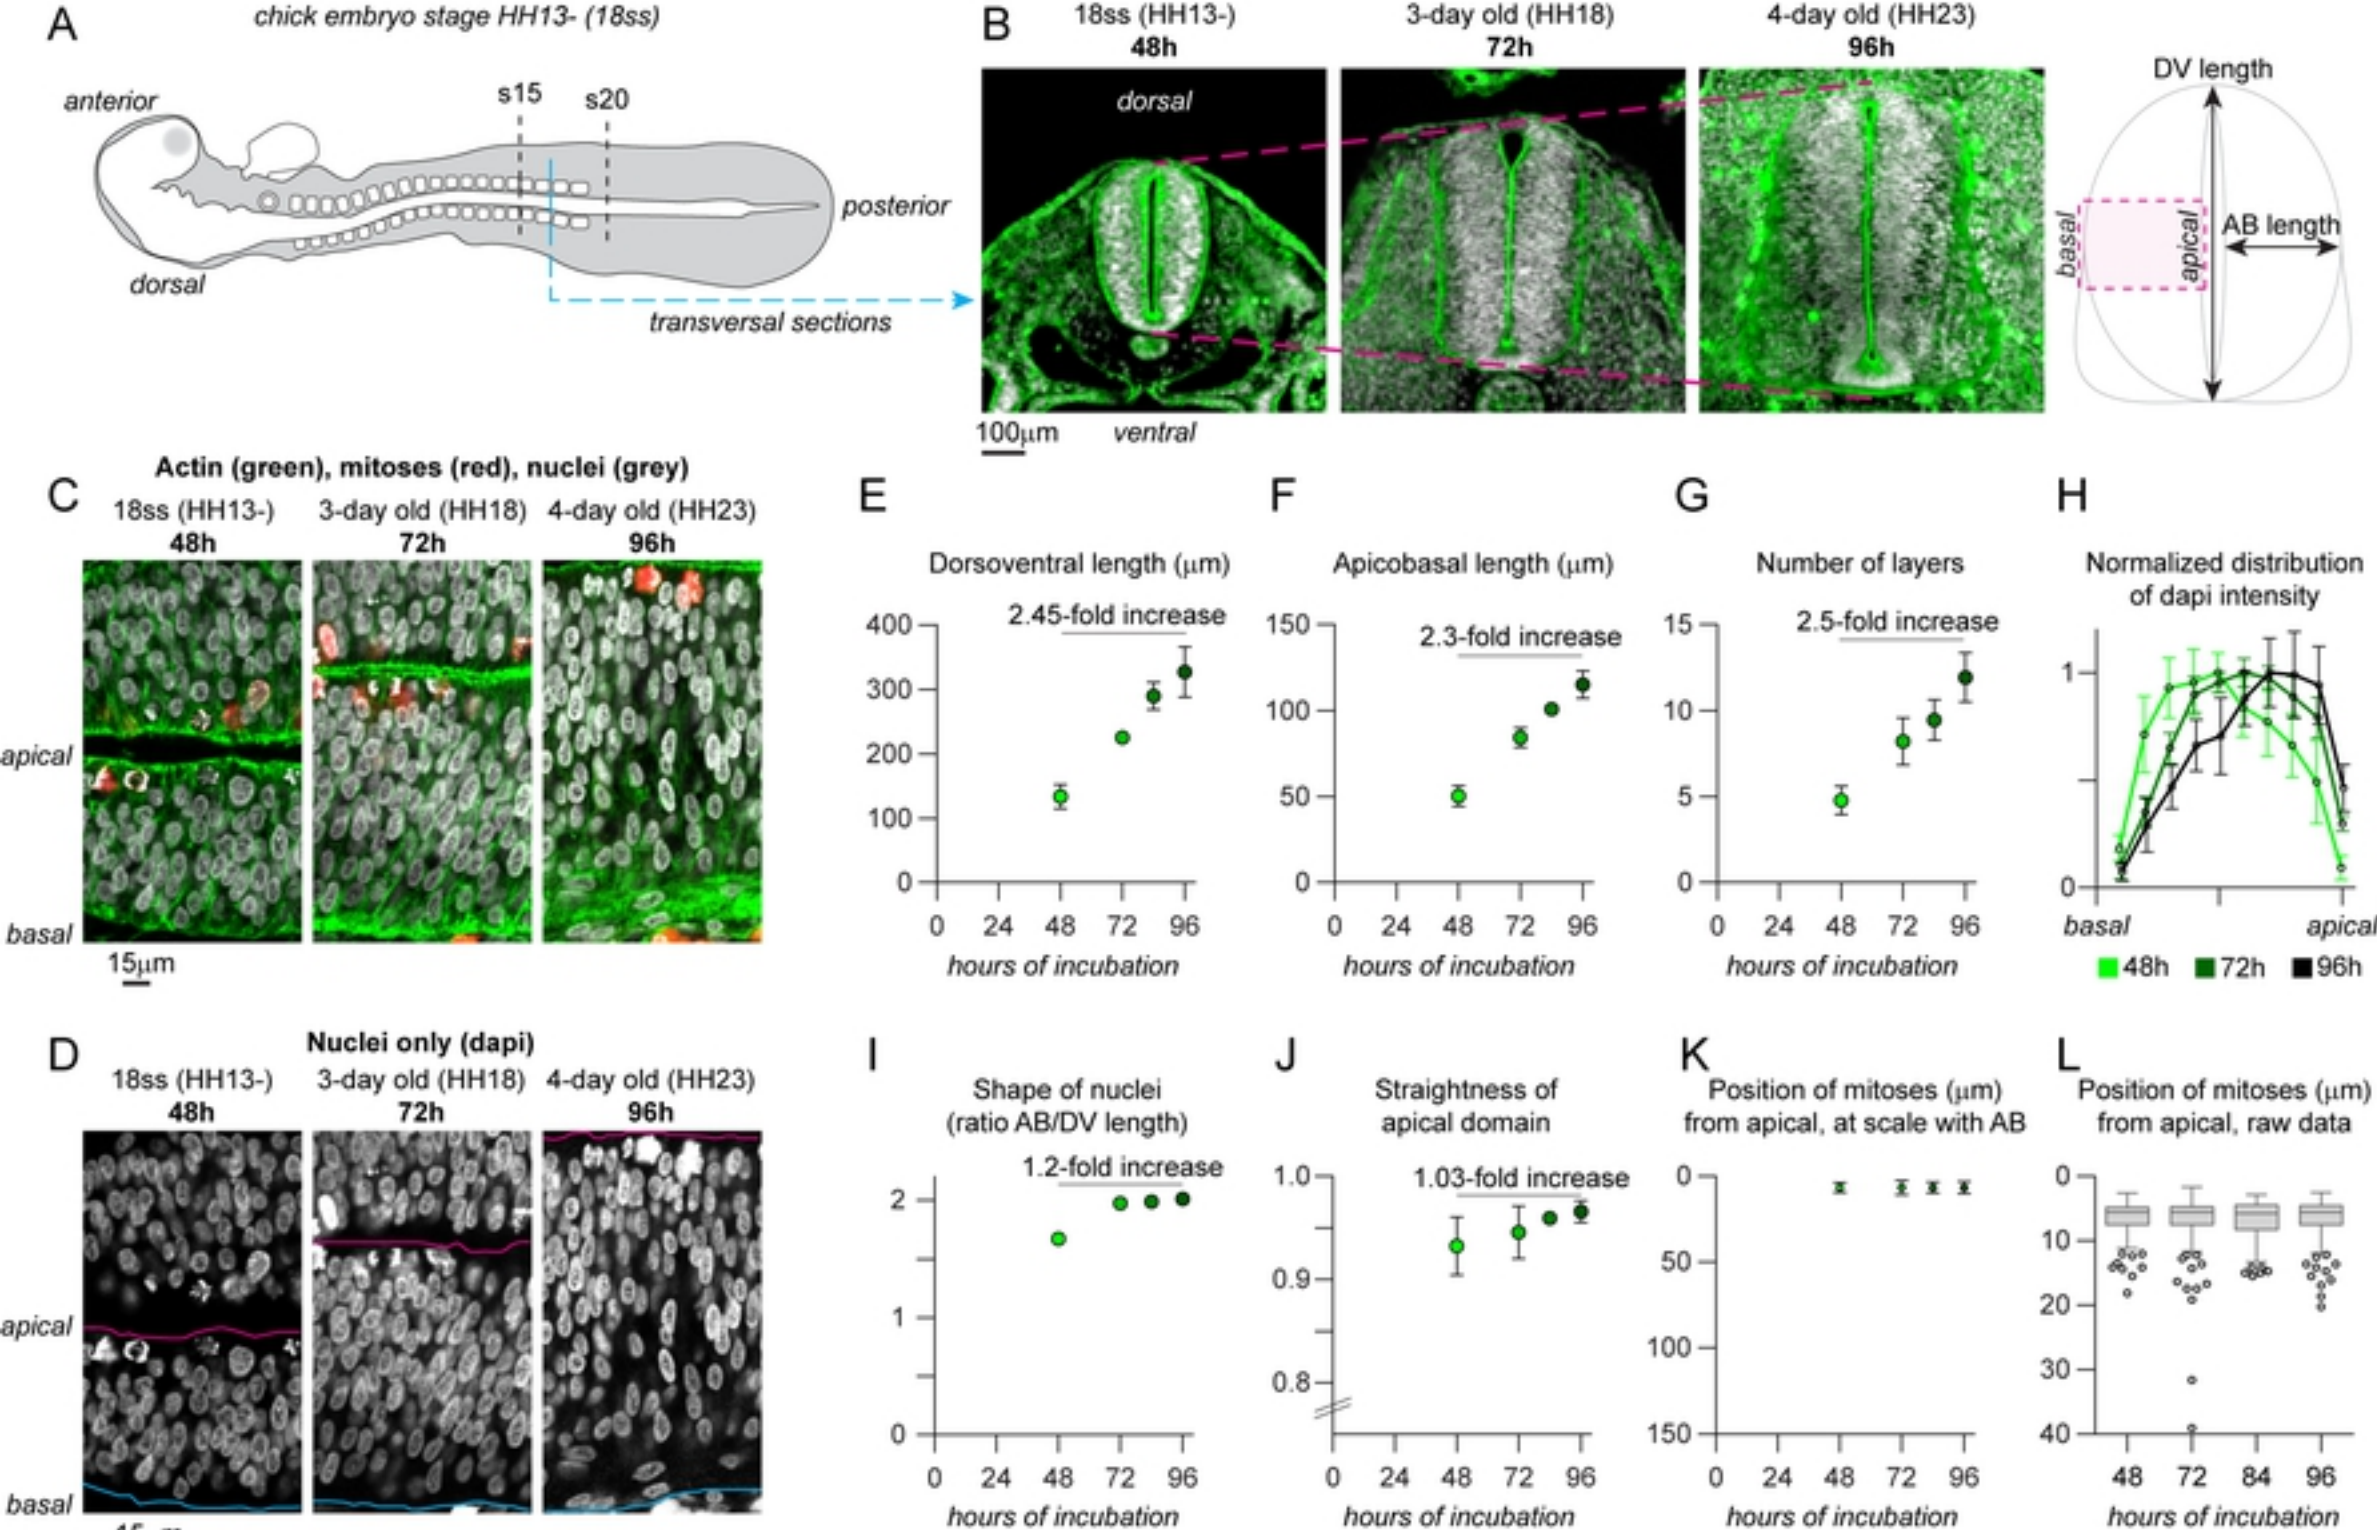

Figure 1

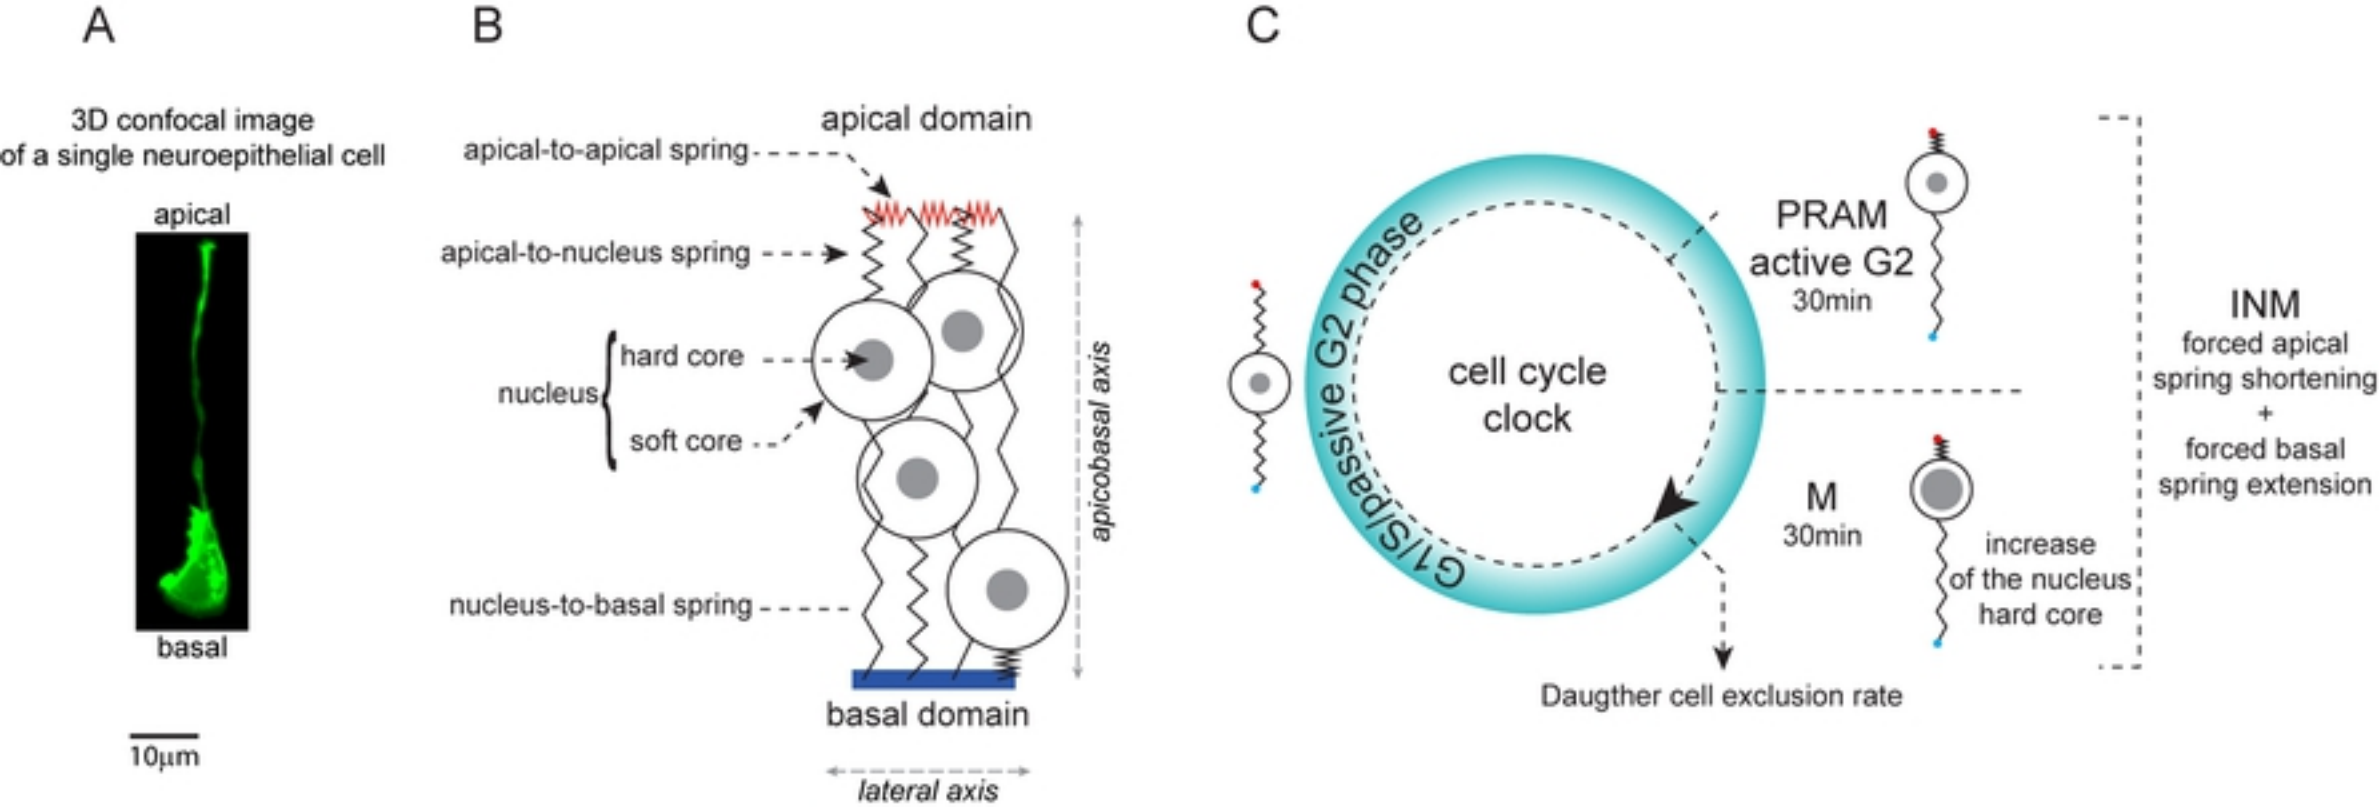

Figure 2



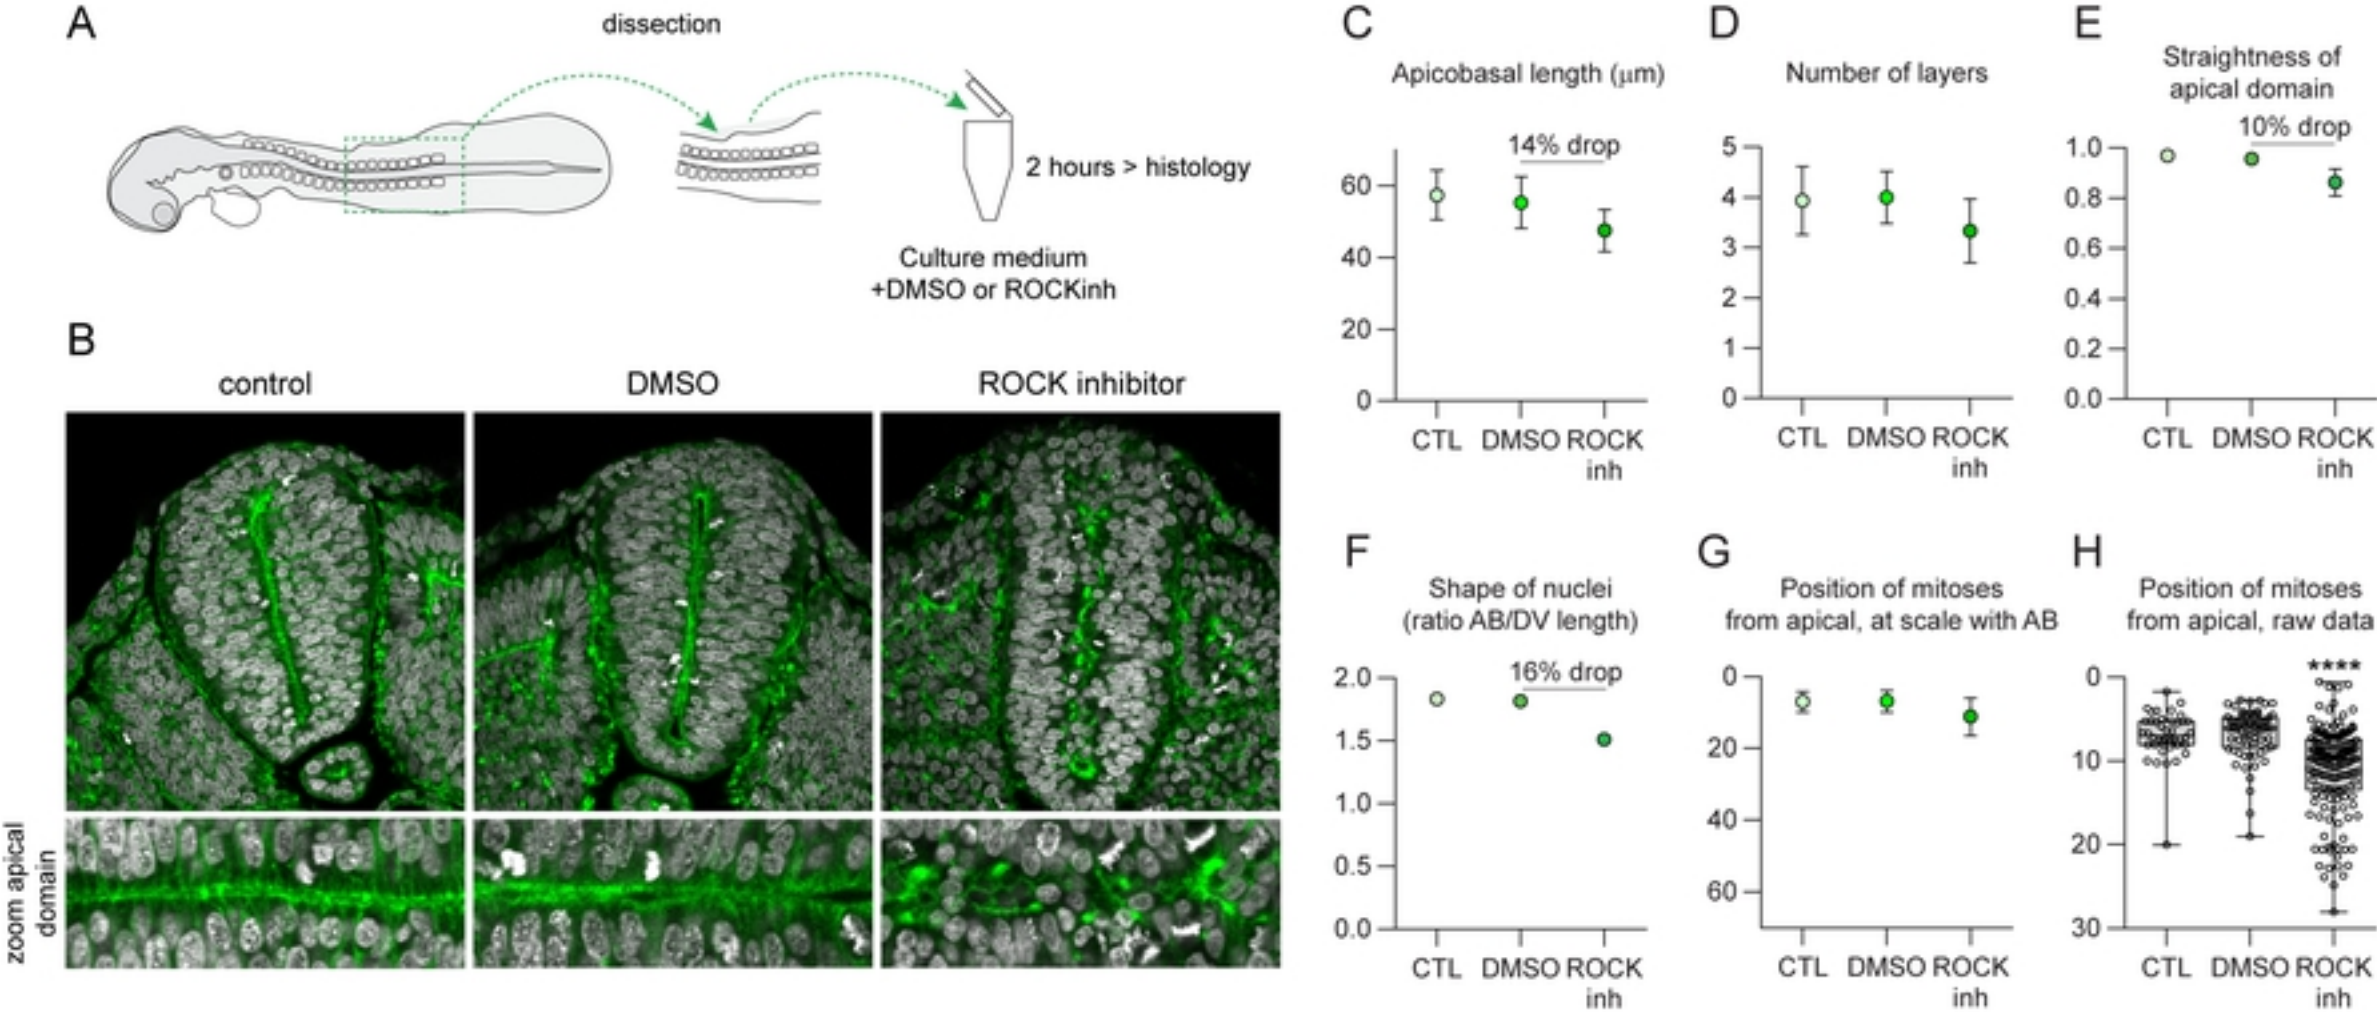

Figure S2

A

Apicobasal length ( $L_{AB}$ )  
 Nuclear-basal length ( $L_N$ )

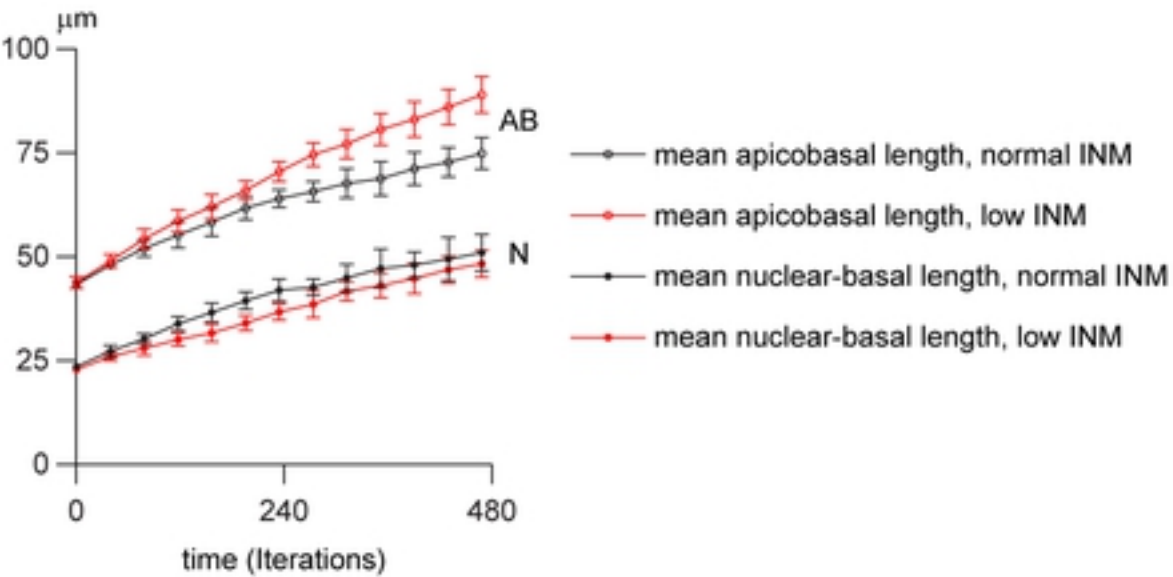

Mean width of apical (magenta), nuclear (black) and basal (cyan) domains  
 $W_{apical}$ ;  $W_{nuclei}$ ;  $W_{basal}$

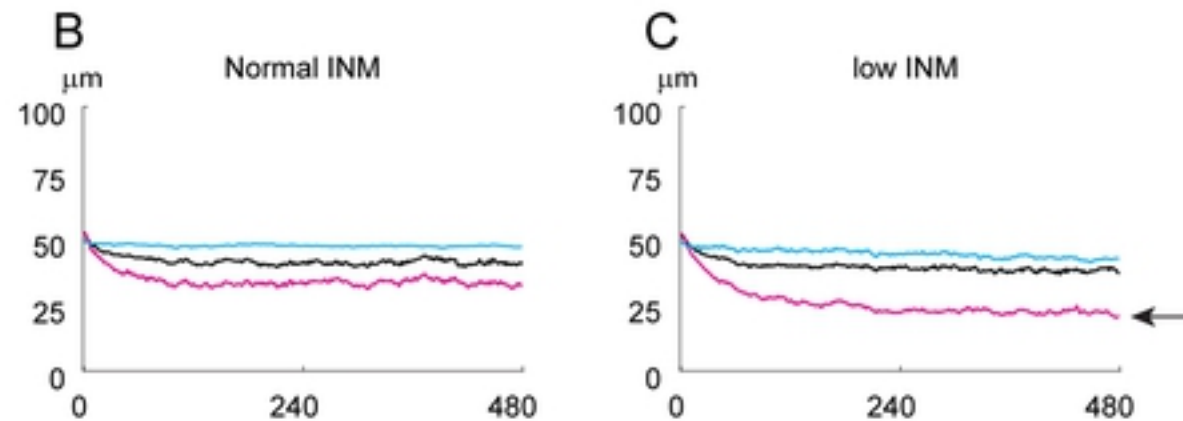

Figure S3

A

18ss (HH13-)

3-day old (HH18)

4-day old (HH23)

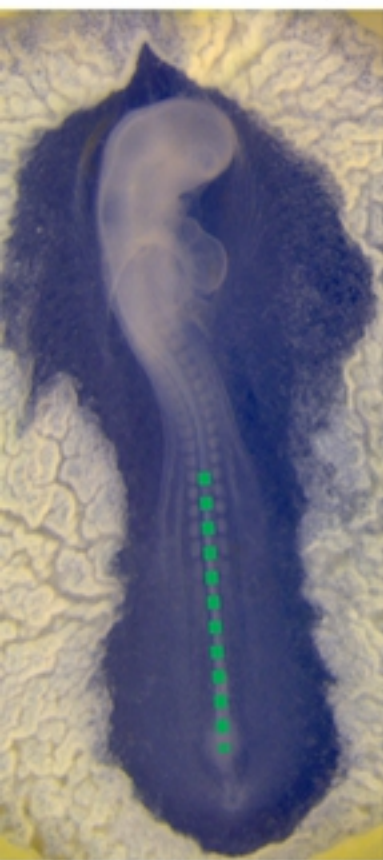

2mm

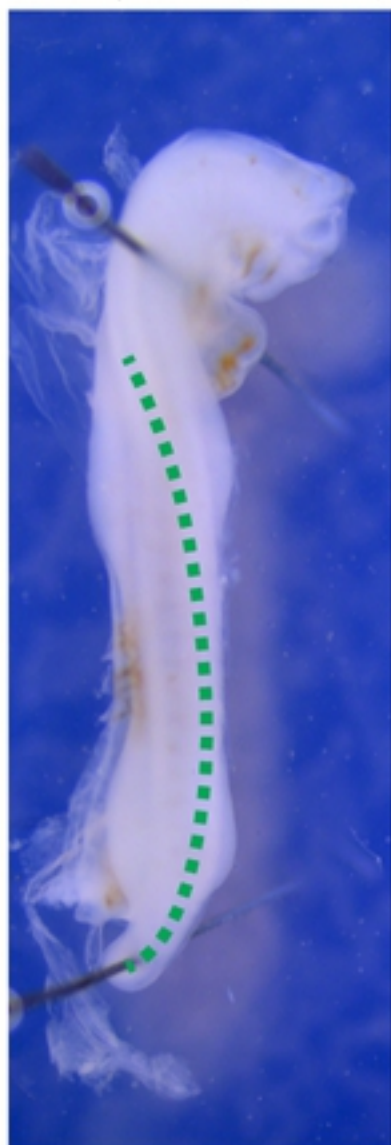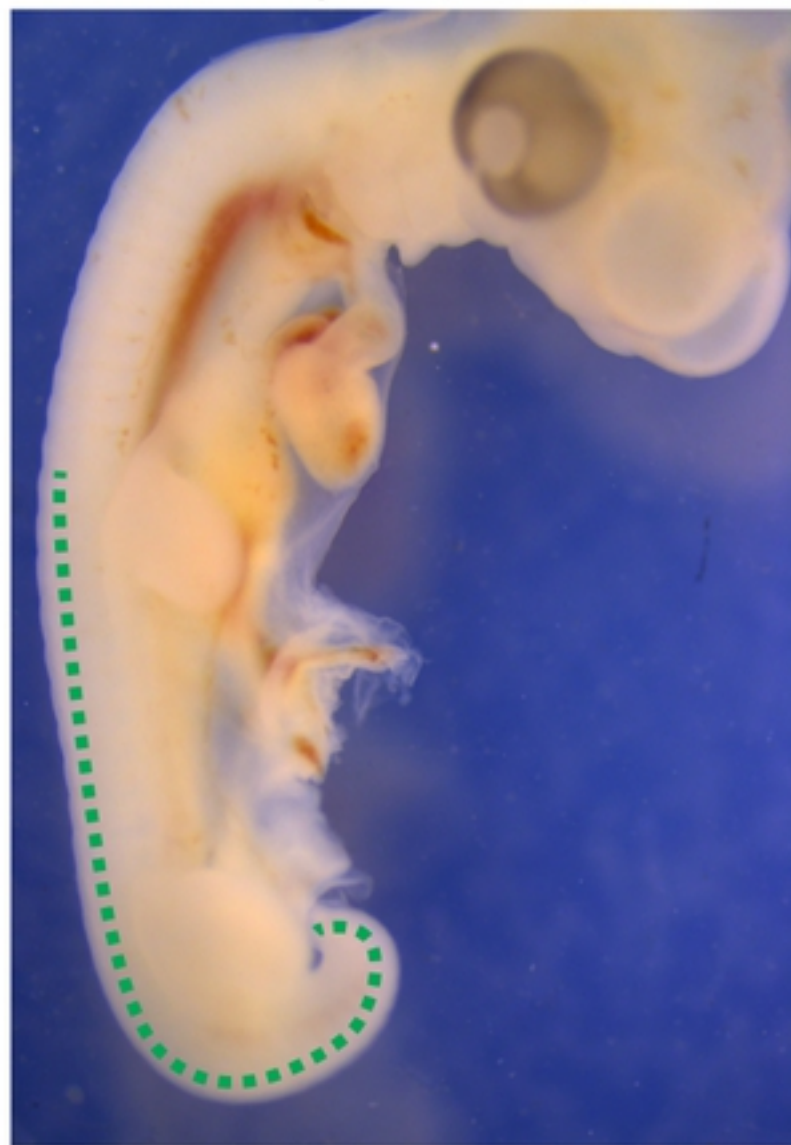

B

Trunk length (mm)  
from somite 15 to posterior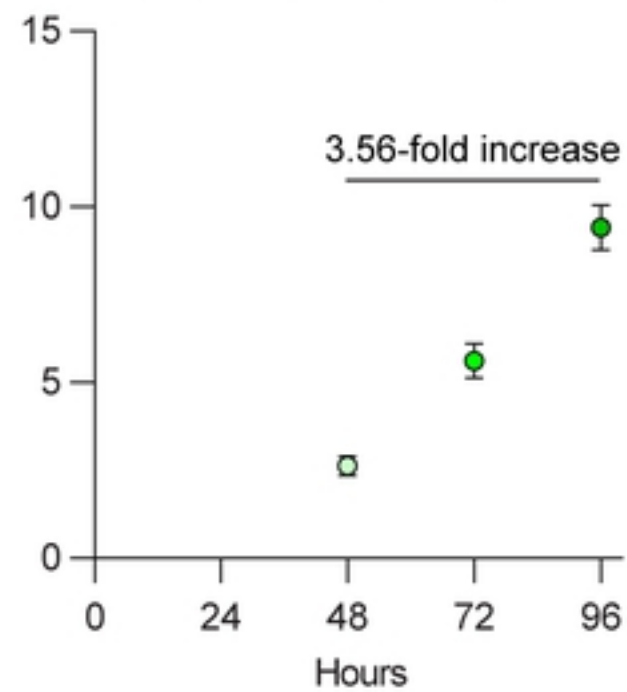

- 18ss (HH13-)
- 3-day old (HH18)
- 4-day old (HH23)

Figure S1
